# Supplementary material for: Synthesis and antitumor activity evaluation of novel substituted 5H-benzo[i][1,3,4]thiadiazolo[3,2-a]quinazoline-6,7-diones
Source: Royal Society of Chemistry journal article supplement (doi:10.1039/c6ra03323g), 2016-01-01
Supplement: c6ra03323g1.pdf [file c6ra03323g1.pdf]

# **Synthesis and antitumor activity evaluation of novel substituted 5*H*-benzo[*i*][1,3,4]thiadiazolo[3,2-*a*]quinazoline-6,7-diones**

**Liqiang Wu\* and Chong Zhong**

*School of Pharmacy, Xinxiang Medical University, Xinxiang 453003, China*

## **Content**

**Copy of UV-vis, IR, <sup>1</sup>H NMR, <sup>13</sup>C NMR and HRMS.....2-**

**44**

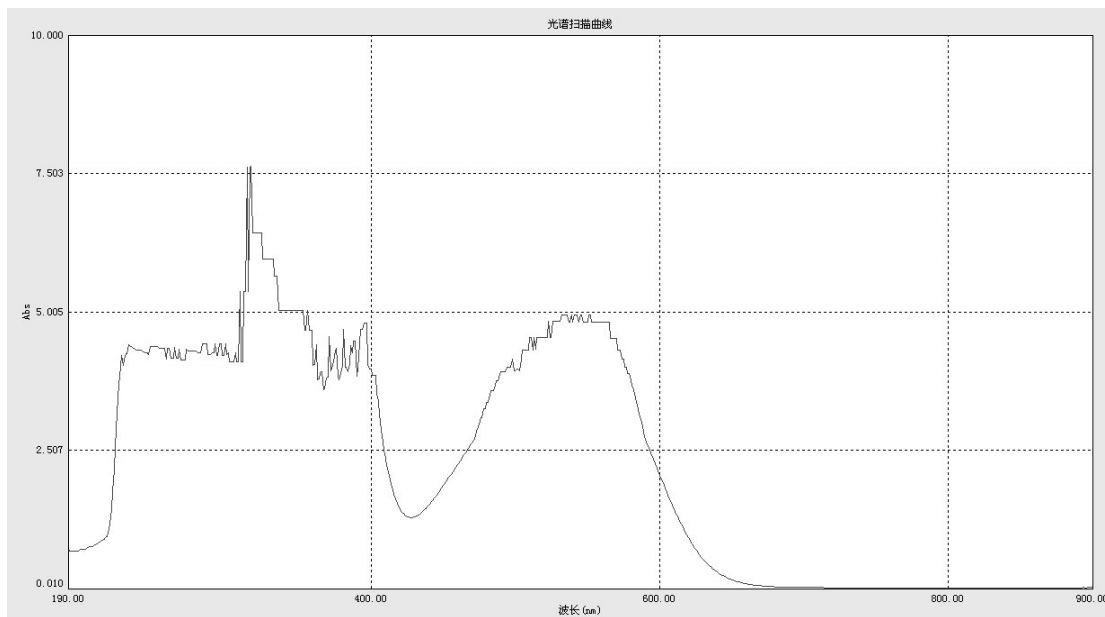

Figure 1 UV-vis of 4a

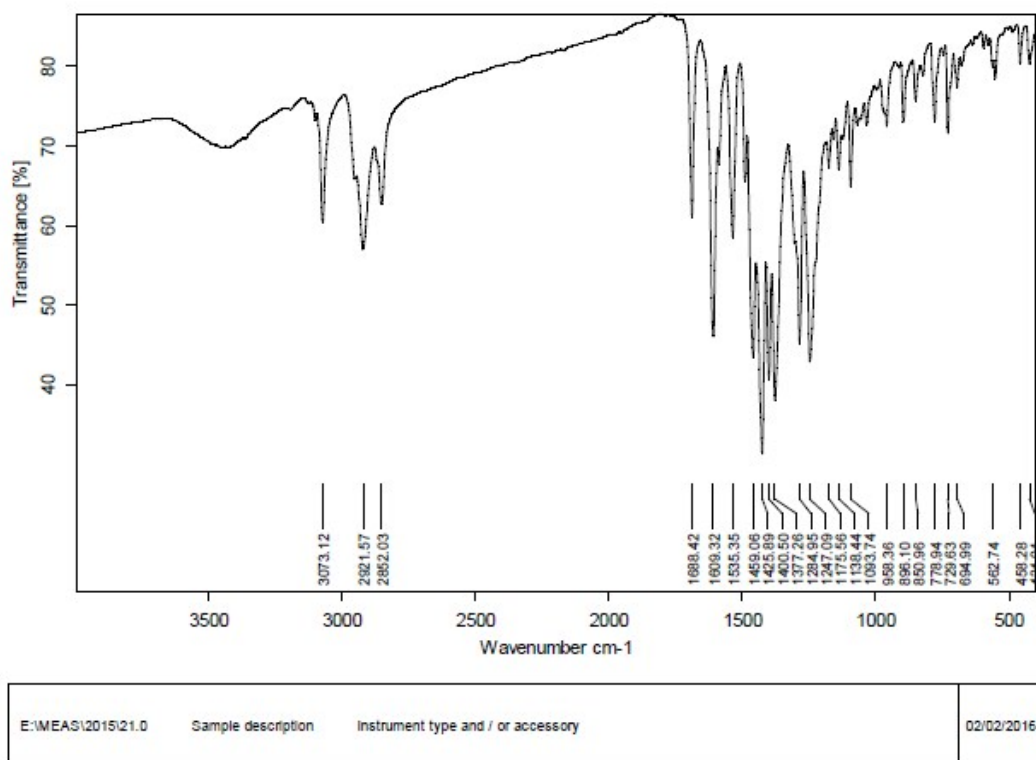

Figure 2 IR of 4a

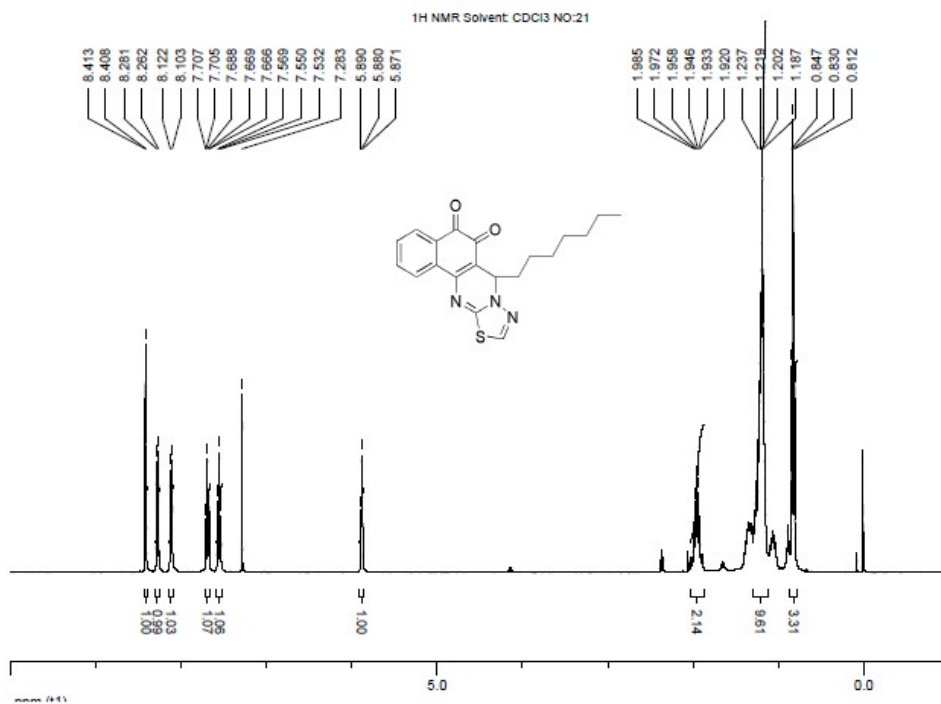

Figure 3  $^1\text{H}$  NMR of 4a

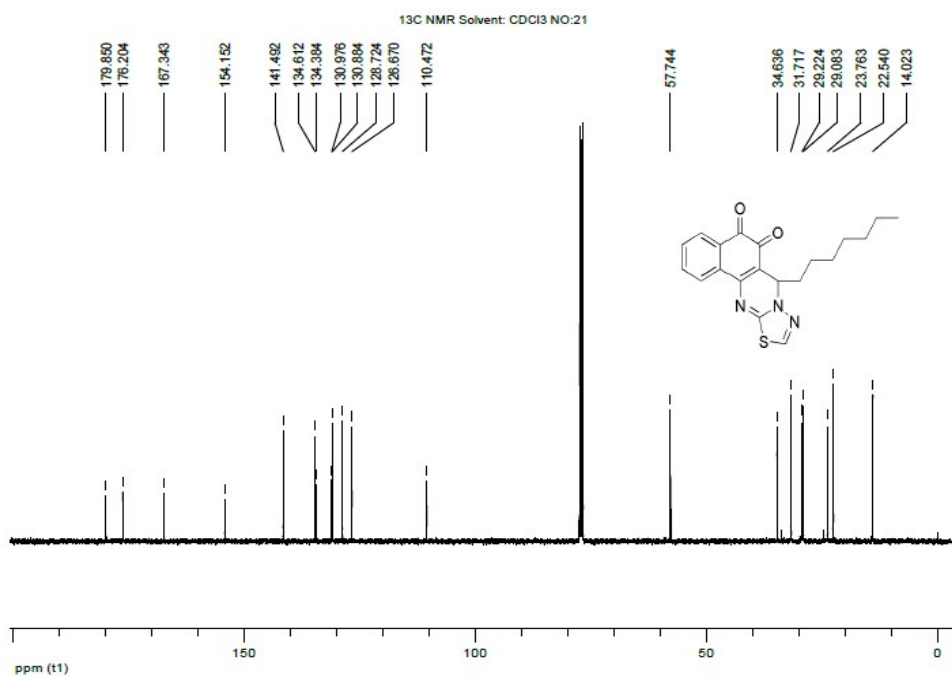

Figure 4  $^{13}\text{C}$  NMR of 4a

# Display Report

| Analysis Info         |                          | Acquisition Date      |                              |                  |           |
|-----------------------|--------------------------|-----------------------|------------------------------|------------------|-----------|
| Analysis Name         | D:\Data\wuliqianglw-21.d | 4/20/2015 9:24:43 AM  |                              |                  |           |
| Method                | Tune_pos_low.m           | Operator              | zjx                          |                  |           |
| Sample Name           | w-21                     | Instrument            | micrOTOF-Q III 8228888.20494 |                  |           |
| Comment               |                          |                       |                              |                  |           |
| Acquisition Parameter |                          |                       |                              |                  |           |
| Source Type           | ESI                      | Ion Polarity          | Positive                     | Set Nebulizer    | 0.3 Bar   |
| Focus                 | Not active               | Set Capillary         | 4500 V                       | Set Dry Heater   | 180 °C    |
| Scan Begin            | 50 m/z                   | Set End Plate Offset  | -500 V                       | Set Dry Gas      | 4.0 l/min |
| Scan End              | 1000 m/z                 | Set Collision Cell RF | 120.0 Vpp                    | Set Divert Valve | Waste     |

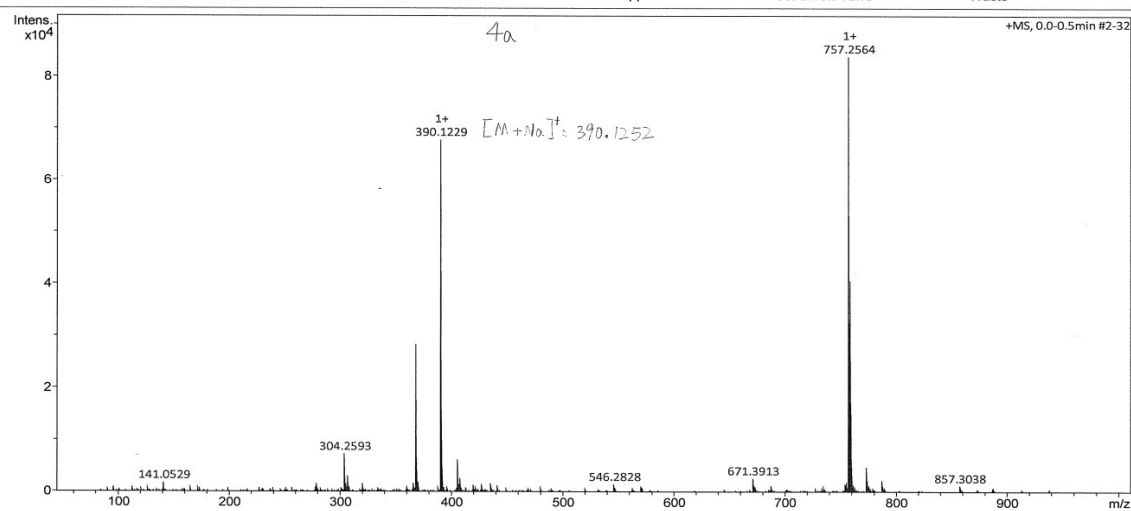

Bruker Compass DataAnalysis 4.2 printed: 4/20/2015 10:26:49 AM by: zjx Page 1 of 1

Figure 5 HRMC of 4a

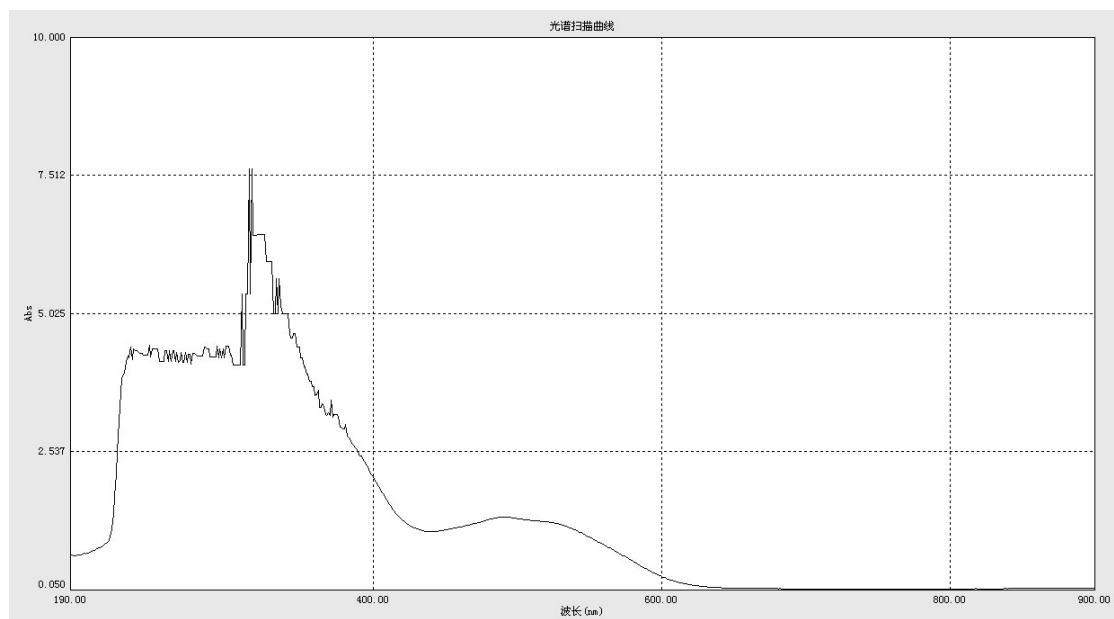

Figure 6 UV-vis of 4b

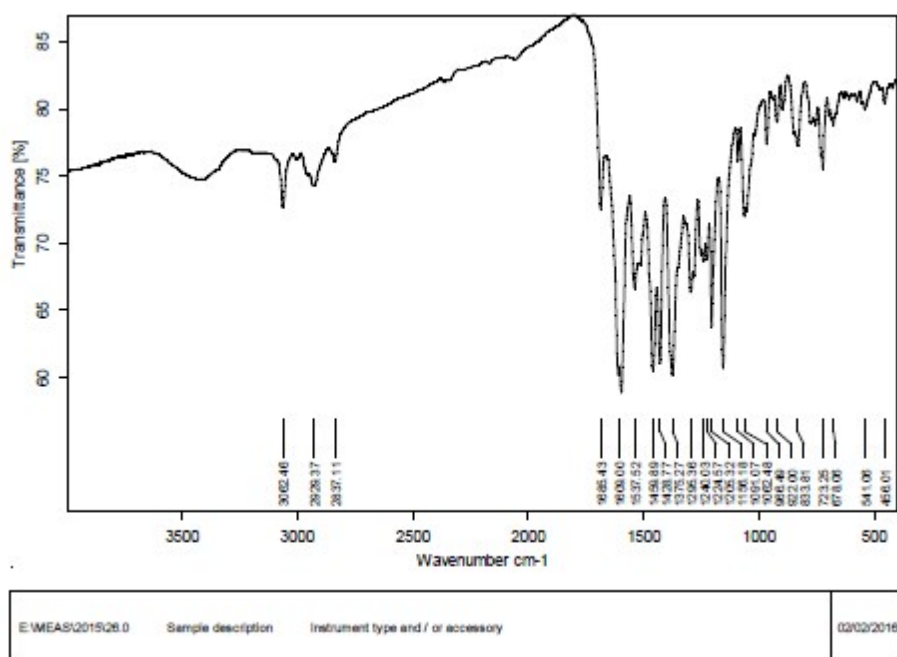

Figure 7 IR of 4b

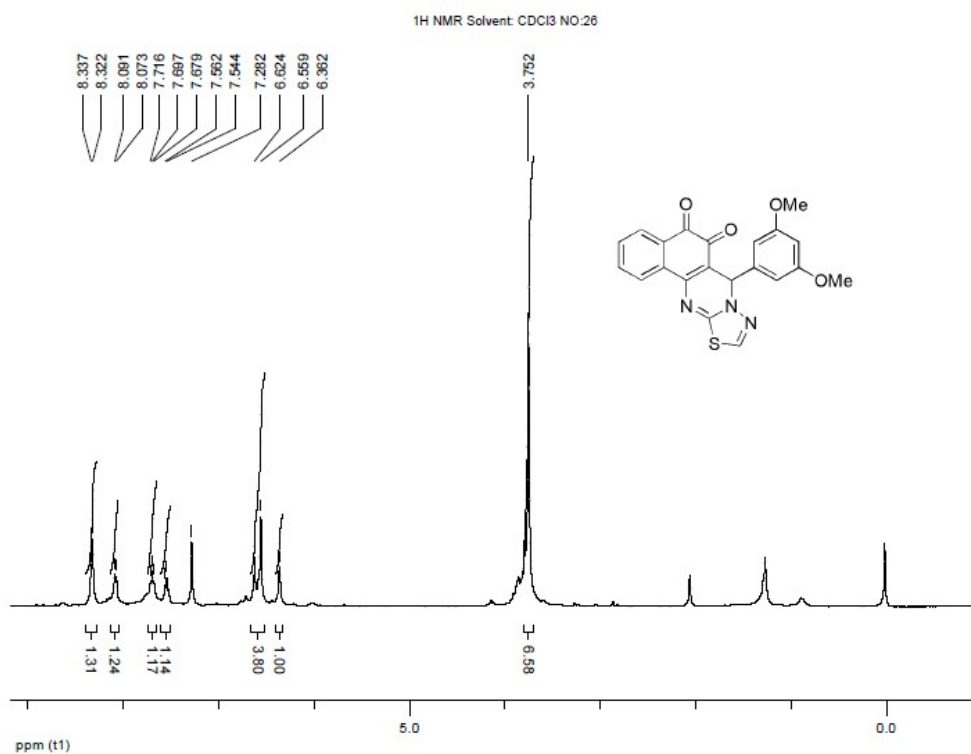

Figure 8 <sup>1</sup>H NMR of 4b

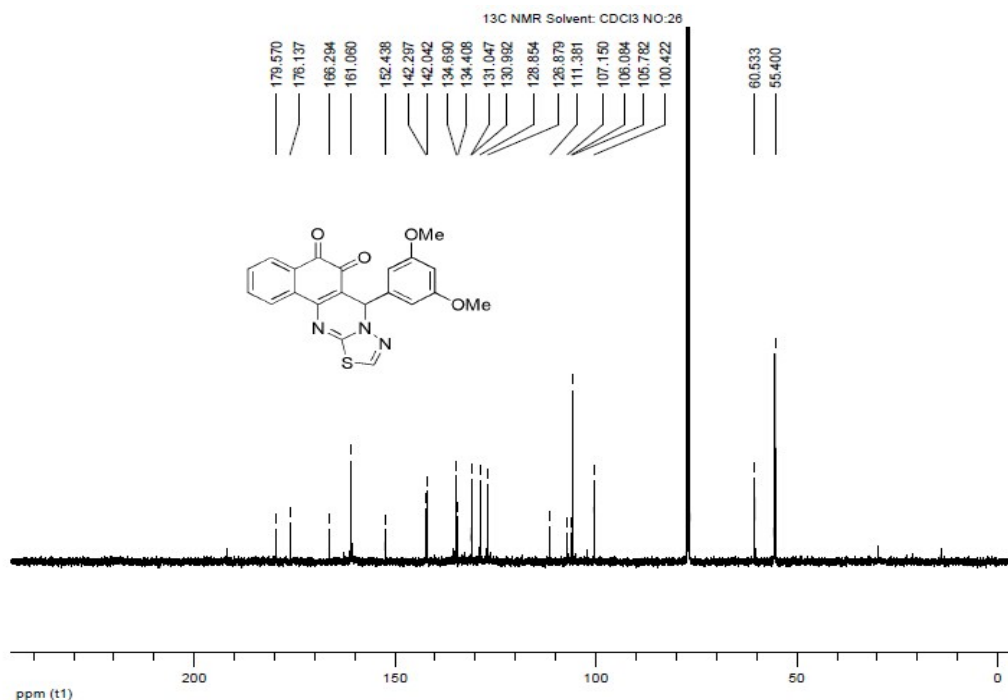

Figure 9  $^{13}\text{C}$  NMR of 4b

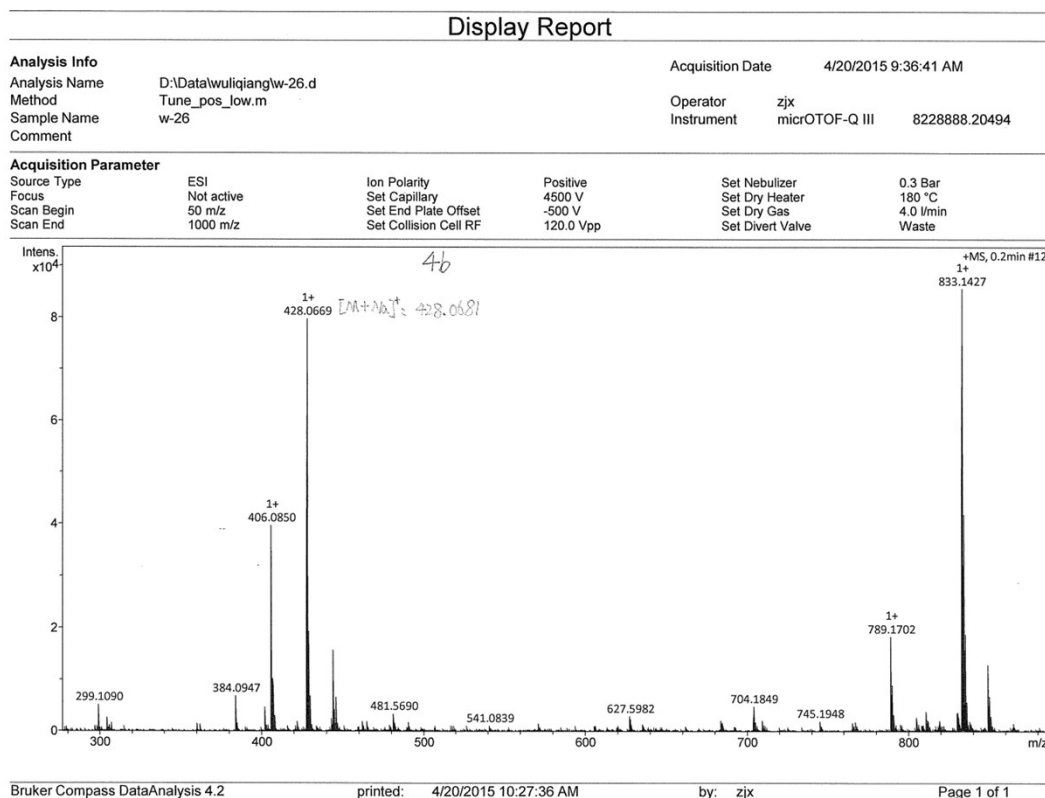

Figure 10 HRMS of 4b

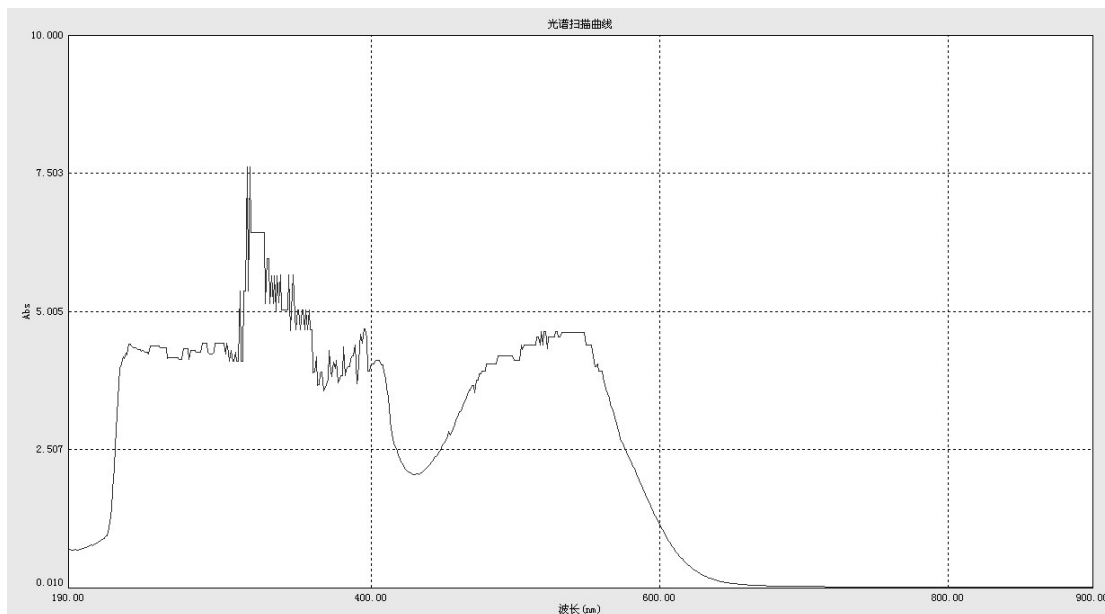

Figure 11 UV-vis of 4c

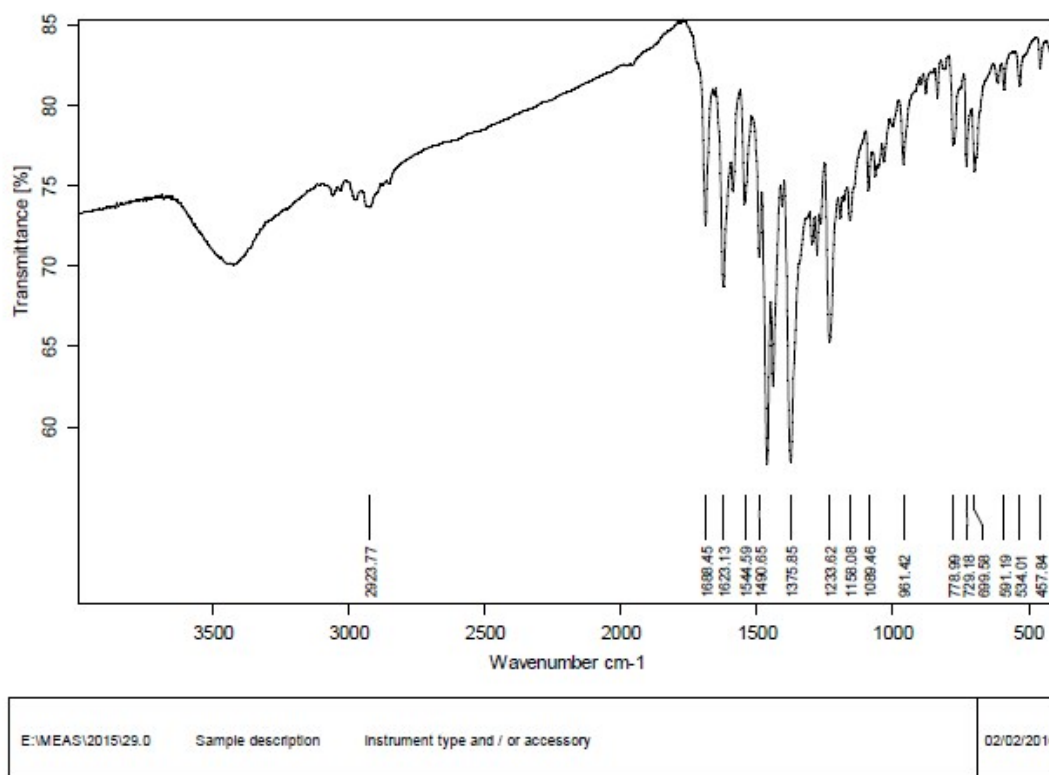

Figure 12 IR of 4c

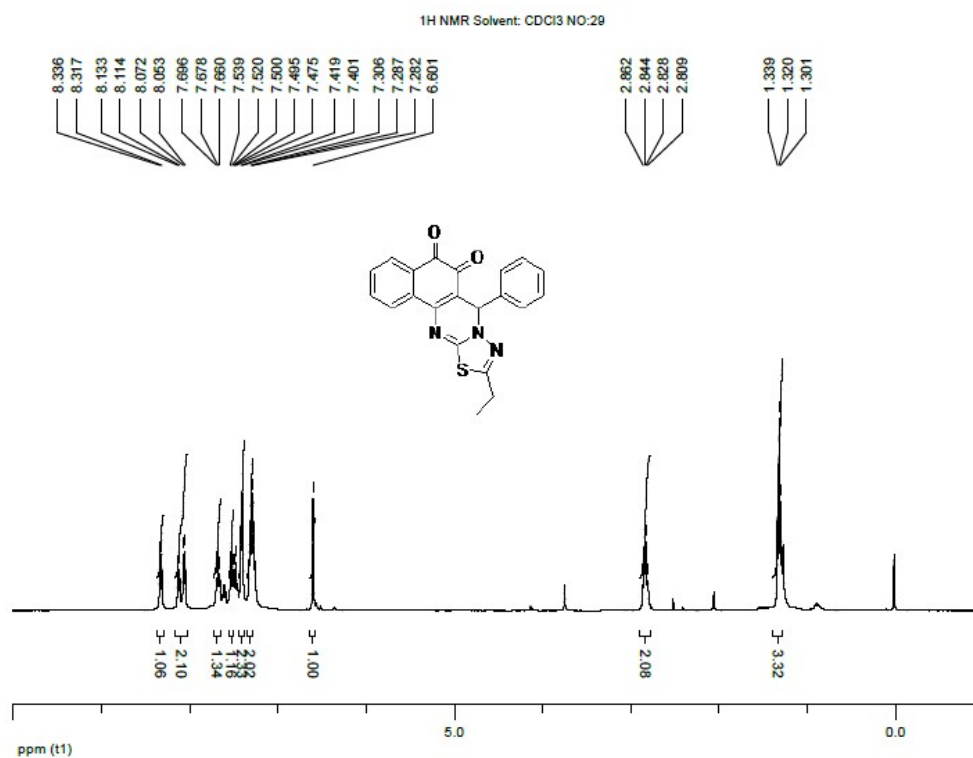

Figure 13  $^1\text{H}$  NMR of 4c

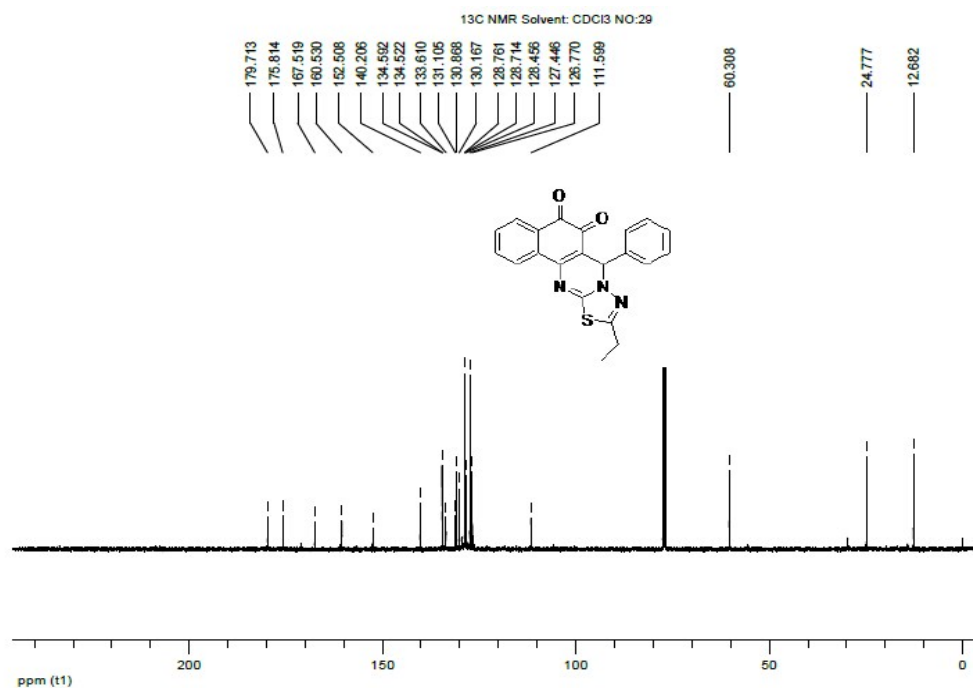

Figure 14  $^{13}\text{C}$  NMR of 4c



## Display Report

**Analysis Info**  
Analysis Name: D:\Data\wuliqiangw-29.d  
Method: Tune\_pos\_low.m  
Sample Name: w-29  
Comment:

Acquisition Date: 4/20/2015 9:19:05 AM  
Operator: zjx  
Instrument: micrOTOF-Q III 8228888.20494

**Acquisition Parameter**

|             |            |                       |           |                  |           |
|-------------|------------|-----------------------|-----------|------------------|-----------|
| Source Type | ESI        | Ion Polarity          | Positive  | Set Nebulizer    | 0.3 Bar   |
| Focus       | Not active | Set Capillary         | 4500 V    | Set Dry Heater   | 180 °C    |
| Scan Begin  | 50 m/z     | Set End Plate Offset  | -500 V    | Set Dry Gas      | 4.0 l/min |
| Scan End    | 1000 m/z   | Set Collision Cell RF | 120.0 Vpp | Set Divert Valve | Waste     |

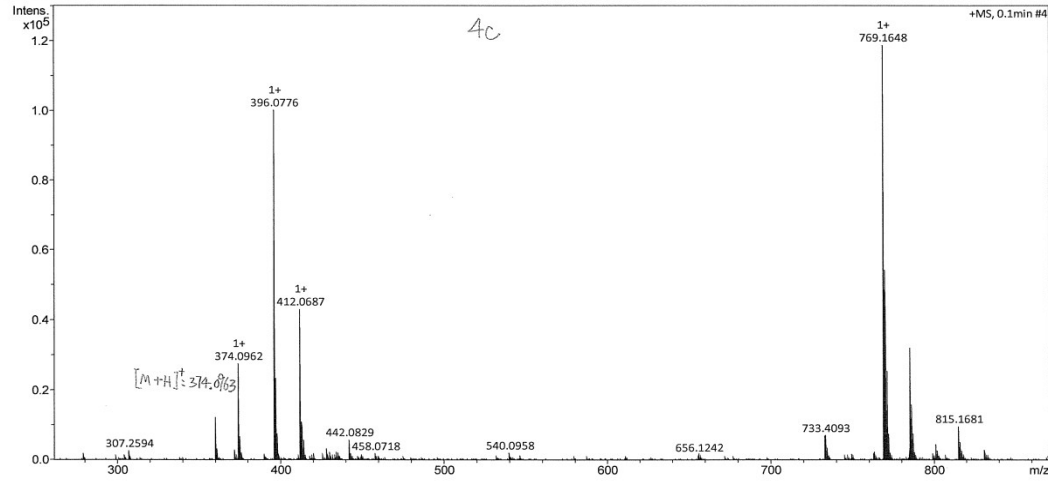

Bruker Compass DataAnalysis 4.2 printed: 4/20/2015 10:28:21 AM by: zjx Page 1 of 1

**Figure 15** HRMS of **4c**

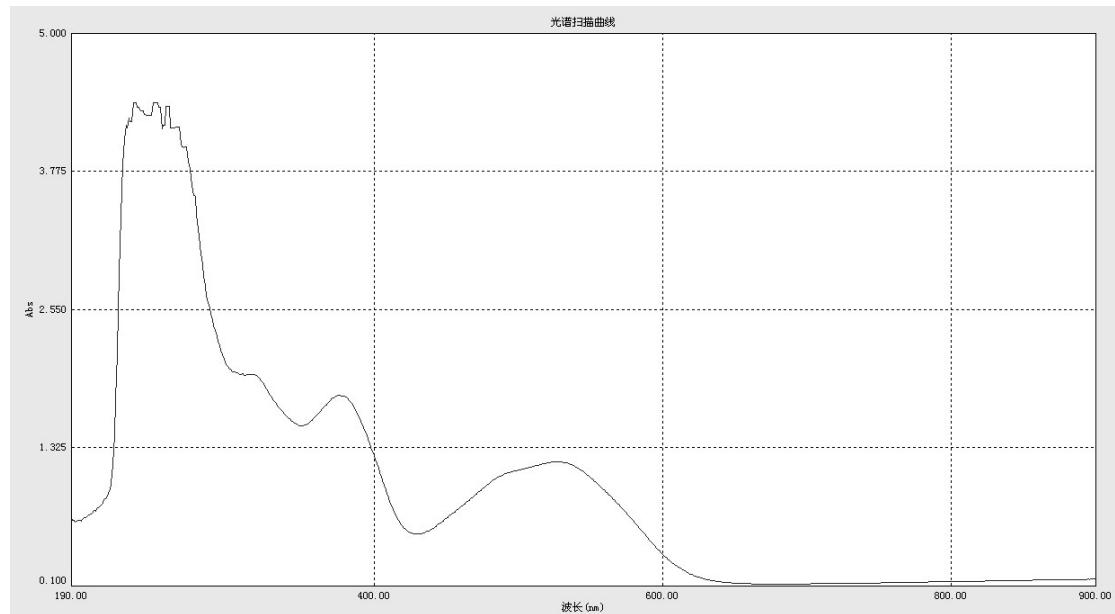

**Figure 16** UV-vis of **4d**

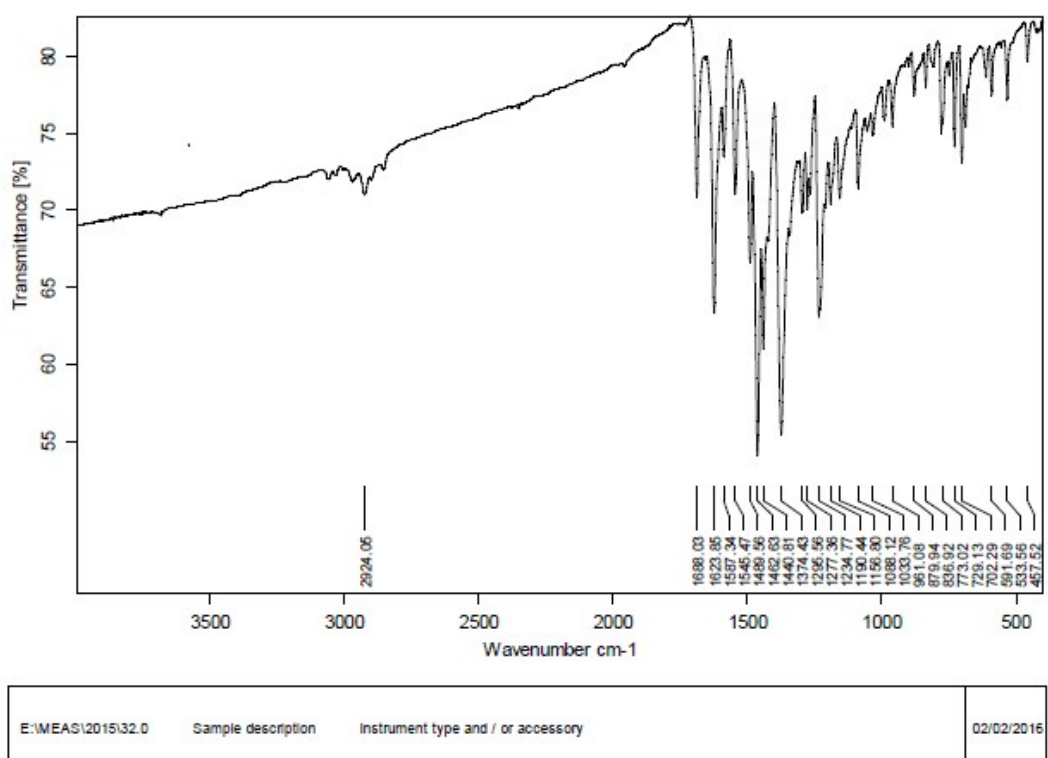

Figure 17 IR of 4d

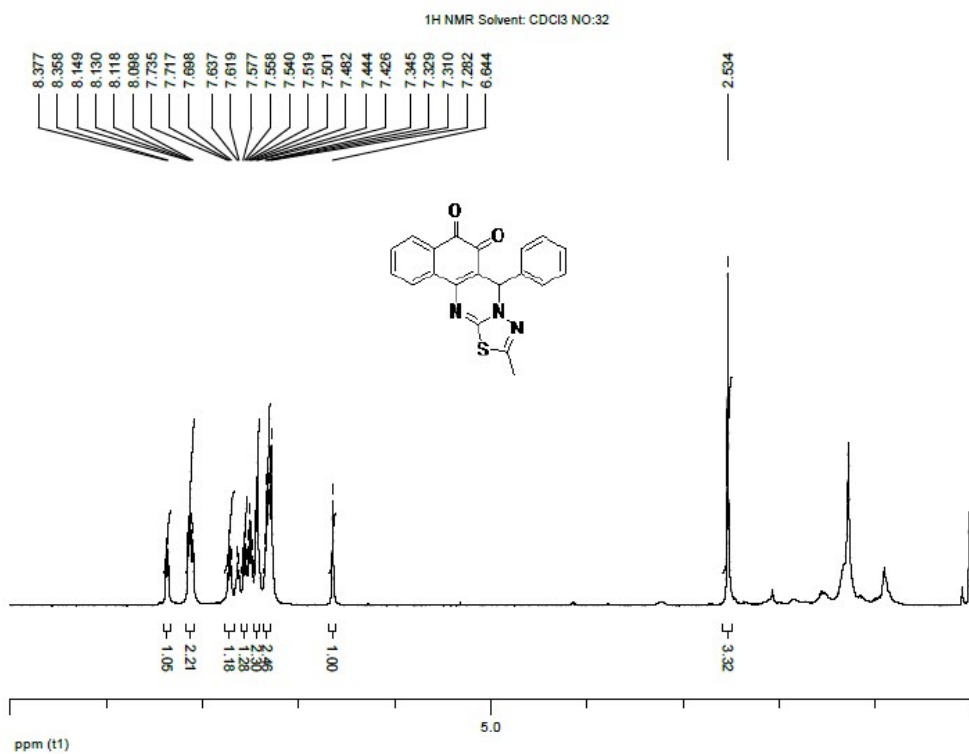

Figure 18 <sup>1</sup>H NMR of 4d

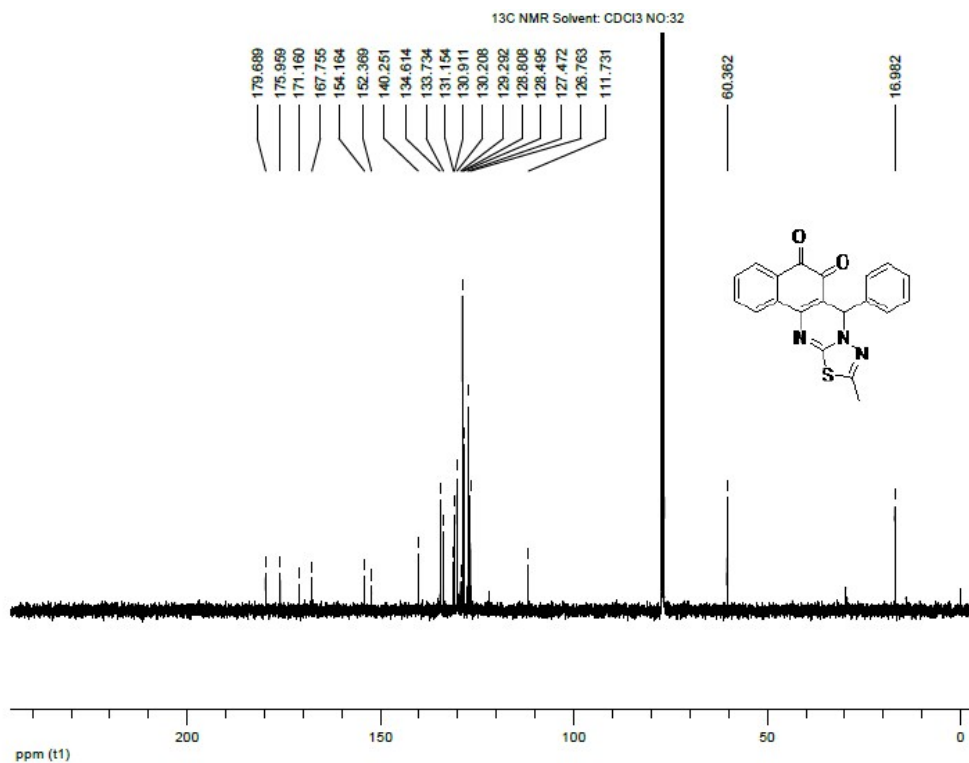

Figure 19  $^{13}\text{C}$  NMR of 4d

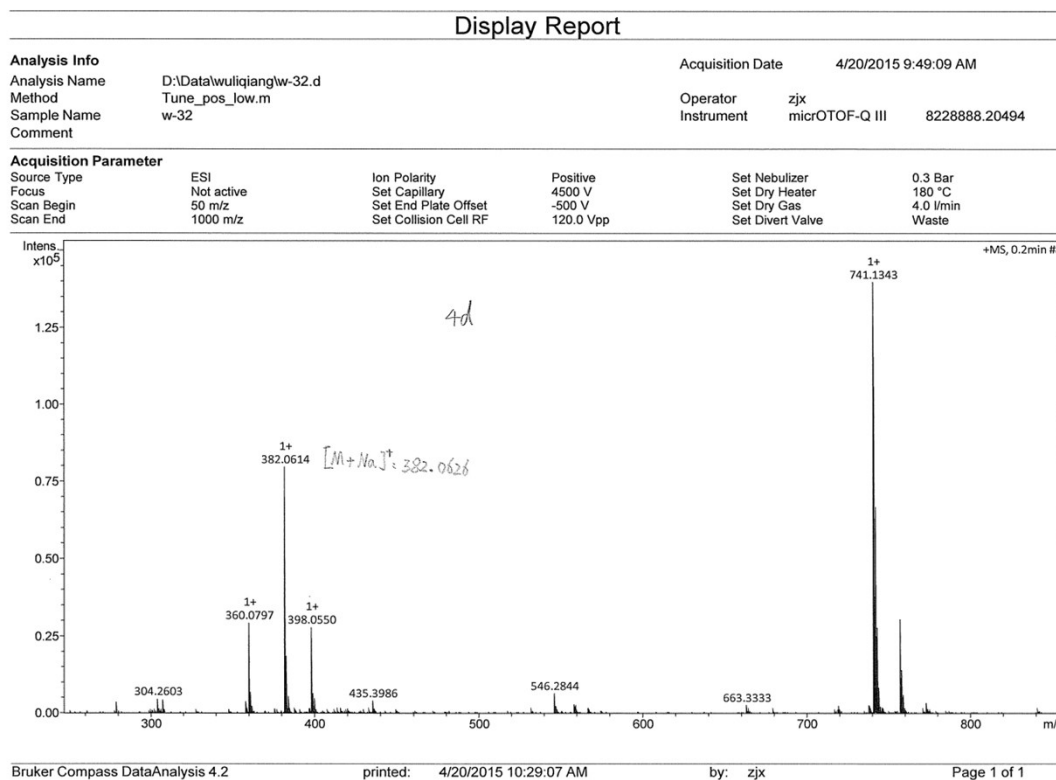

Figure 20 HRMS of 4d

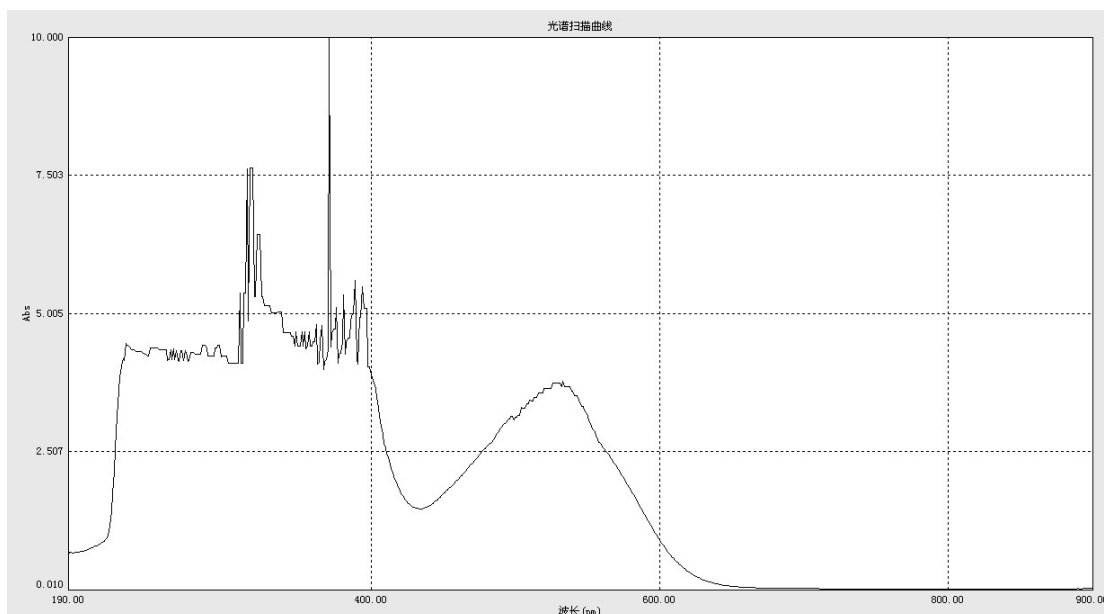

Figure 21 UV-vis of 4e

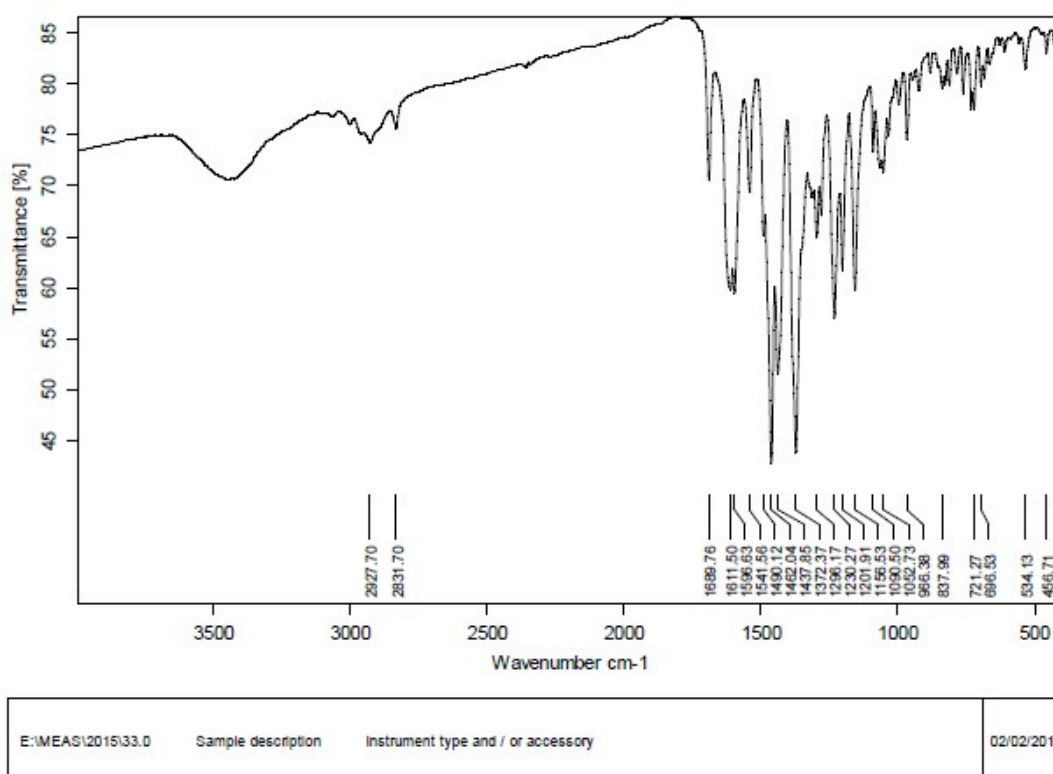

Figure 22 IR of 4e

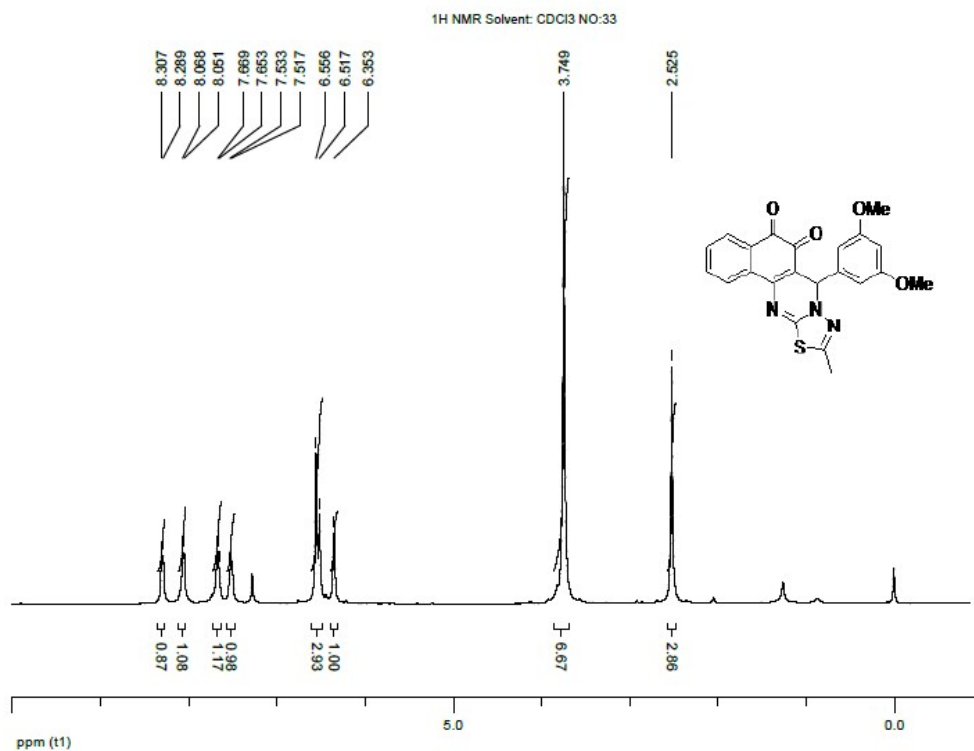

Figure 23  $^1\text{H}$  NMR of 4e

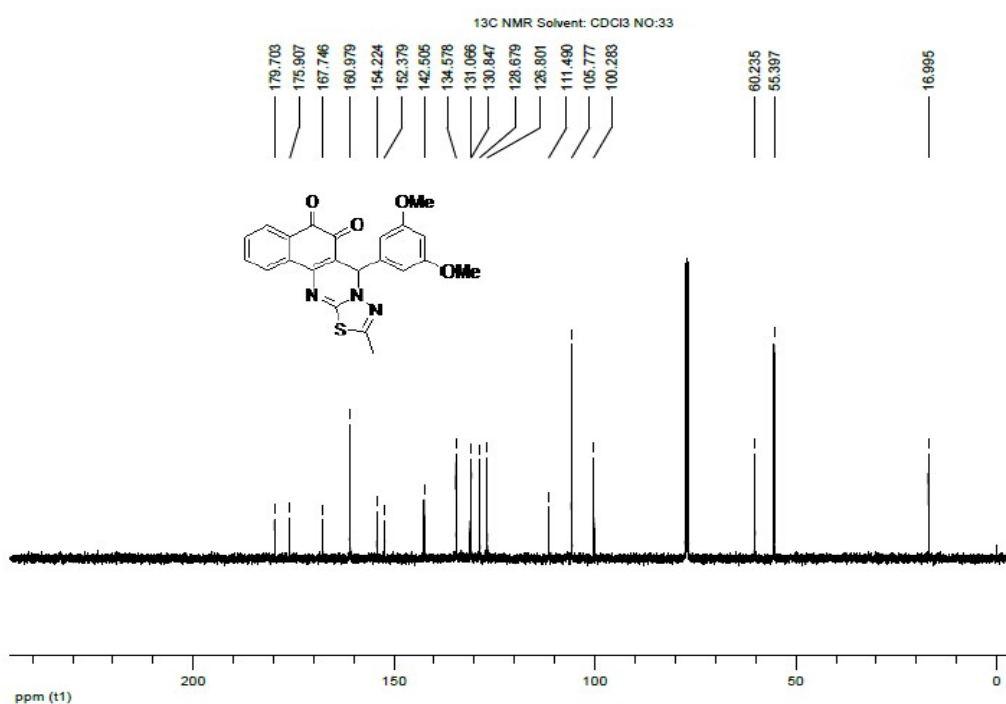

Figure 24  $^{13}\text{C}$  NMR of 4e

## Display Report

|                              |                          |                       |                |                      |           |
|------------------------------|--------------------------|-----------------------|----------------|----------------------|-----------|
| <b>Analysis Info</b>         |                          | Acquisition Date      |                | 4/20/2015 9:39:10 AM |           |
| Analysis Name                | D:\Data\wuliqiang\w-33.d | Operator              | zjx            |                      |           |
| Method                       | Tune_pos_low.m           | Instrument            | micrOTOF-Q III |                      |           |
| Sample Name                  | w-33                     |                       | 8228888.20494  |                      |           |
| Comment                      |                          |                       |                |                      |           |
| <b>Acquisition Parameter</b> |                          |                       |                |                      |           |
| Source Type                  | ESI                      | Ion Polarity          | Positive       | Set Nebulizer        | 0.3 Bar   |
| Focus                        | Not active               | Set Capillary         | 4500 V         | Set Dry Heater       | 180 °C    |
| Scan Begin                   | 50 m/z                   | Set End Plate Offset  | -500 V         | Set Dry Gas          | 4.0 l/min |
| Scan End                     | 1000 m/z                 | Set Collision Cell RF | 120.0 Vpp      | Set Divert Valve     | Waste     |

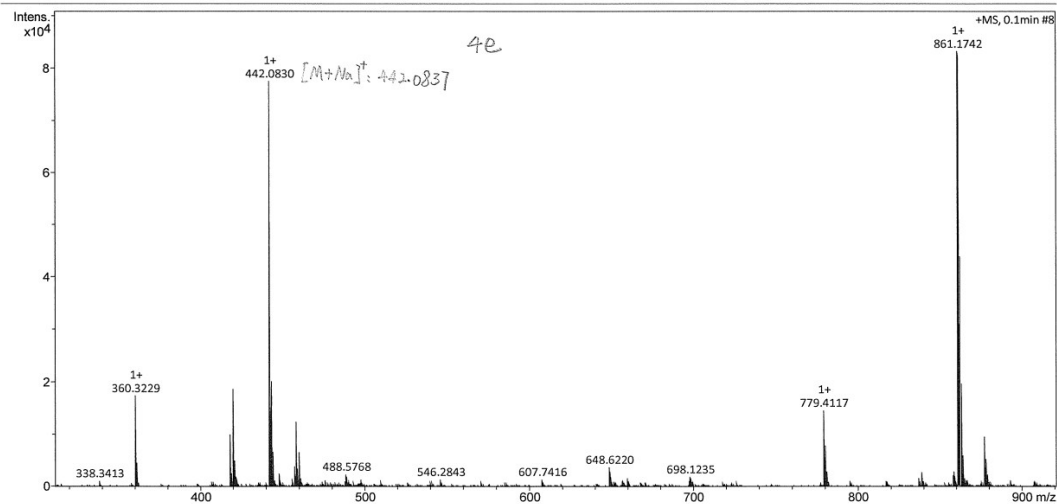

Bruker Compass DataAnalysis 4.2      printed: 4/20/2015 10:30:12 AM      by: zjx      Page 1 of 1

**Figure 25** HRMS of **4e**

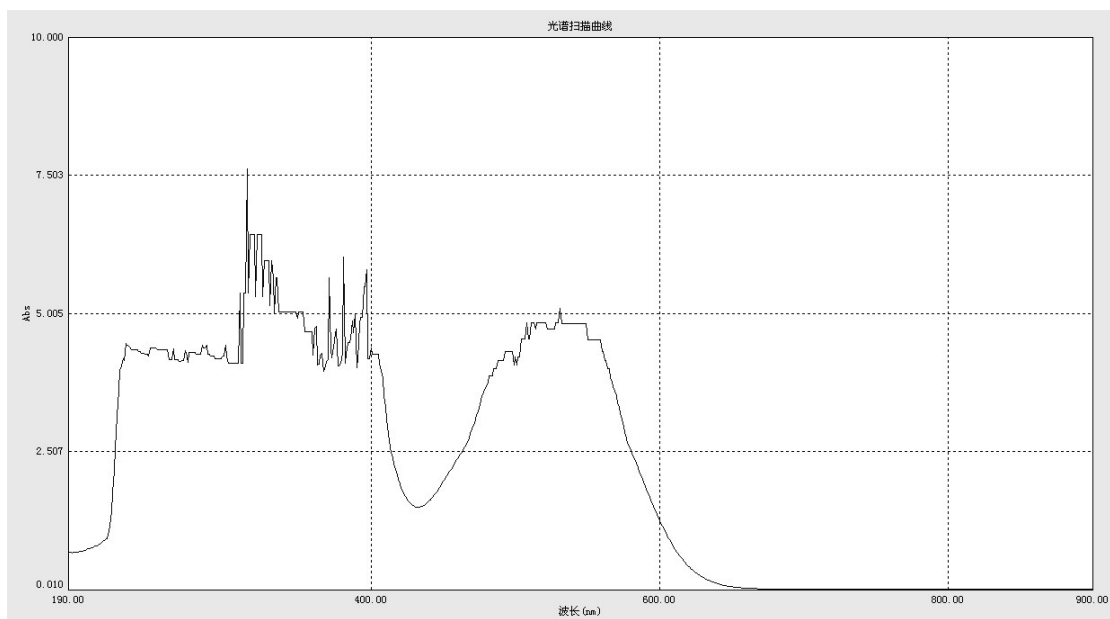

**Figure 26** UV-vis of **4f**

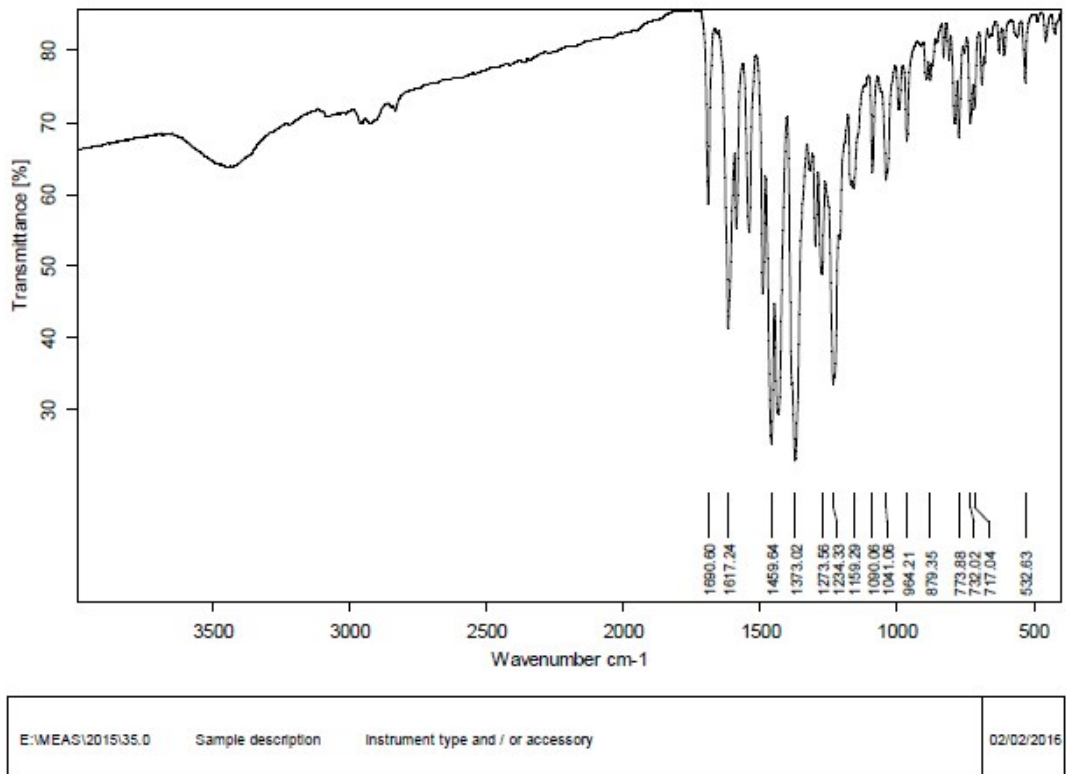

Figure 27 IR of 4f

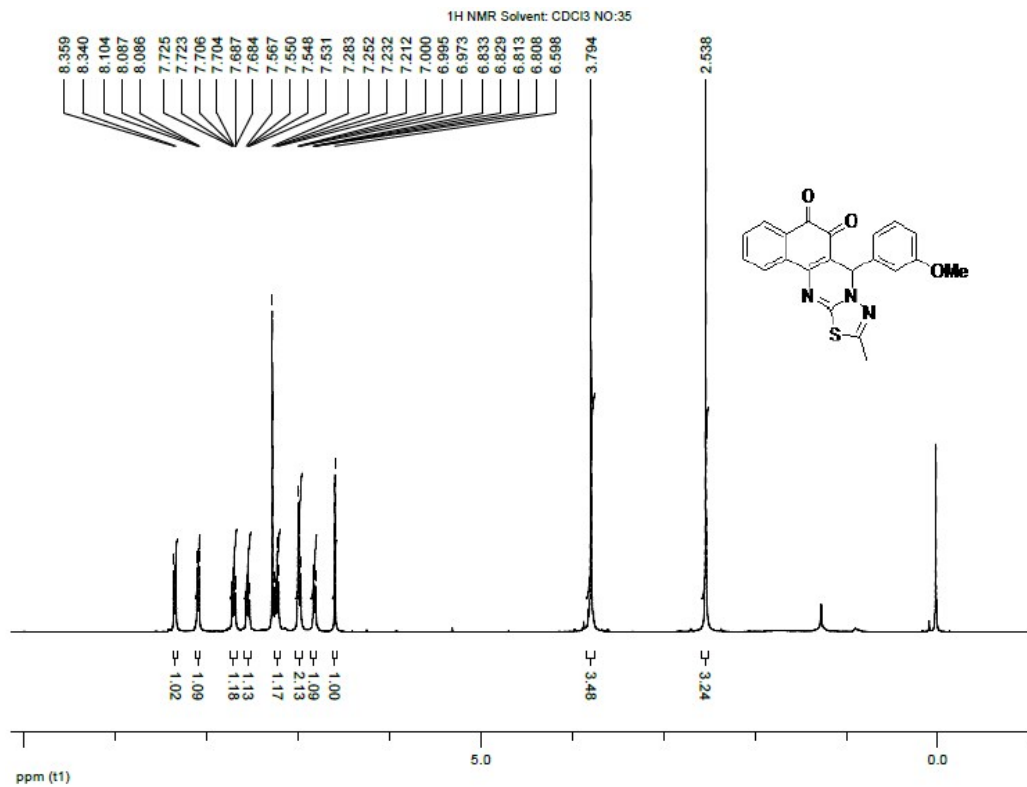

Figure 28 <sup>1</sup>H NMR of 4f

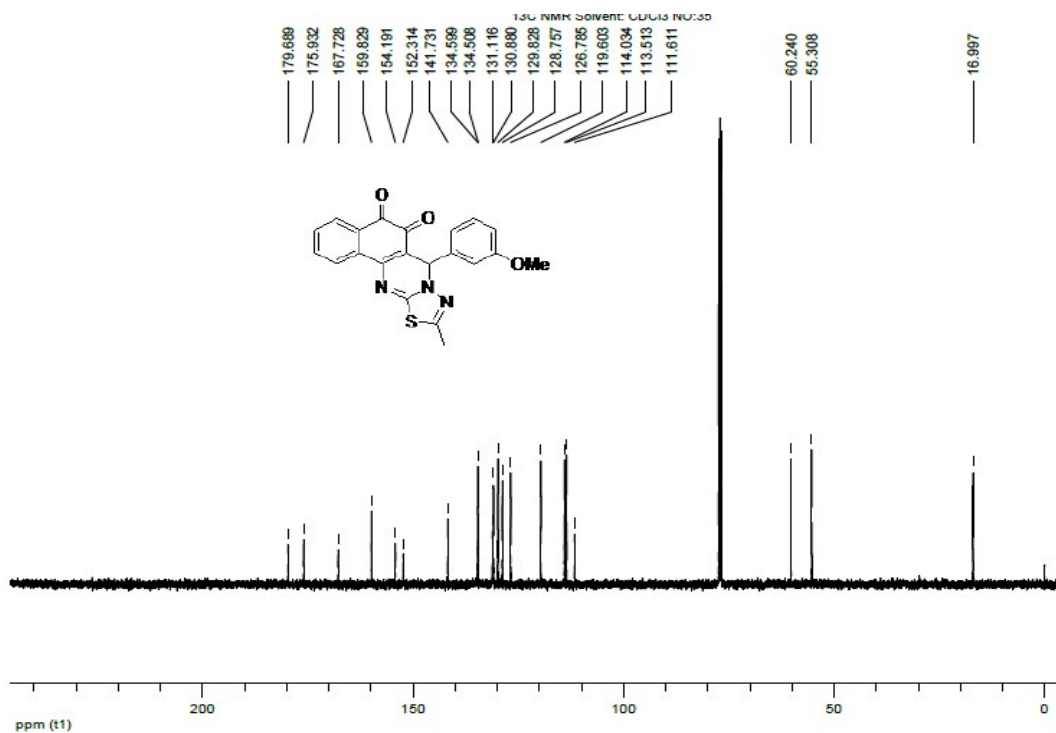

Figure 29 <sup>13</sup>C NMR of 4f

Display Report

| Analysis Info |                          | Acquisition Date     |                              |
|---------------|--------------------------|----------------------|------------------------------|
| Analysis Name | D:\Data\wuliqiang\w-35.d | 4/20/2015 9:52:12 AM |                              |
| Method        | Tune_pos_low.m           | Operator             | zjx                          |
| Sample Name   | w-35                     | Instrument           | micrOTOF-Q III 8228888.20494 |
| Comment       |                          |                      |                              |

| Acquisition Parameter |            |                       |           |
|-----------------------|------------|-----------------------|-----------|
| Source Type           | ESI        | Ion Polarity          | Positive  |
| Focus                 | Not active | Set Capillary         | 4500 V    |
| Scan Begin            | 50 m/z     | Set End Plate Offset  | -500 V    |
| Scan End              | 1000 m/z   | Set Collision Cell RF | 120.0 Vpp |
|                       |            | Set Nebulizer         | 0.3 Bar   |
|                       |            | Set Dry Heater        | 180 °C    |
|                       |            | Set Dry Gas           | 4.0 l/min |
|                       |            | Set Divert Valve      | Waste     |

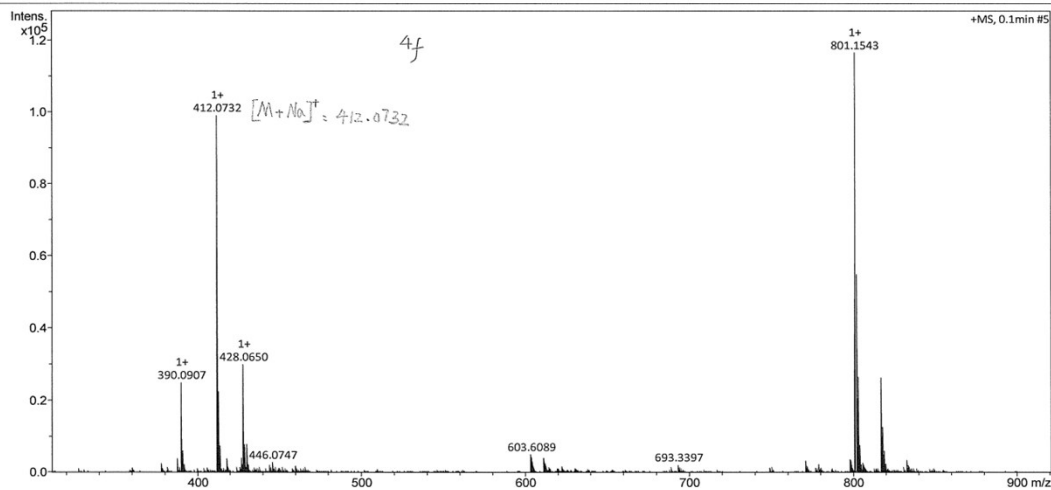

Bruker Compass DataAnalysis 4.2 printed: 4/20/2015 10:31:01 AM by: zjx Page 1 of 1

Figure 30 HRMS of 4f



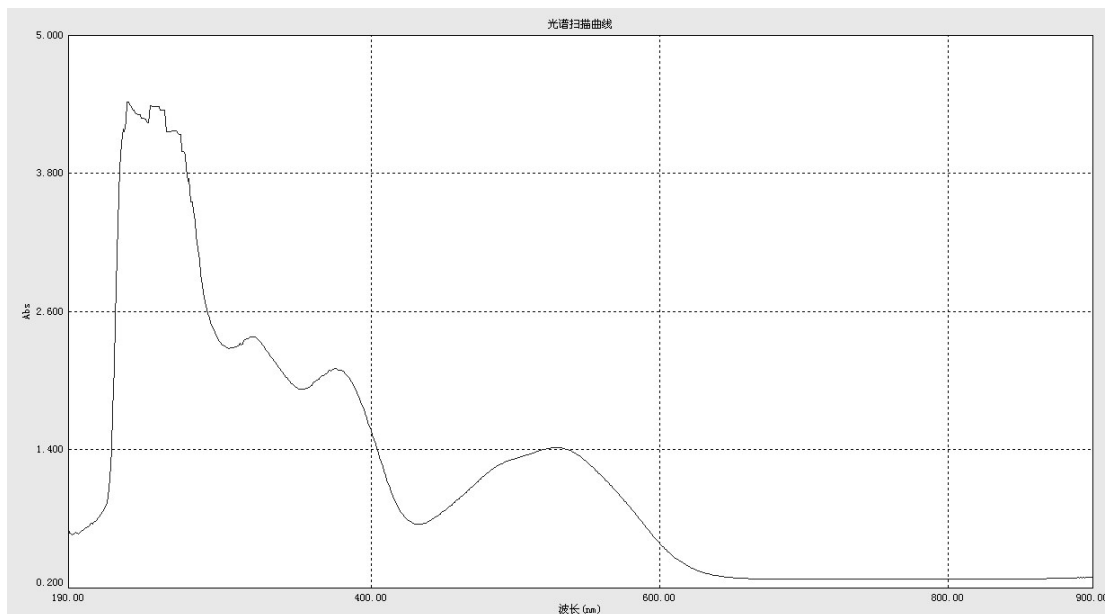

Figure 31 UV-vis of 4g

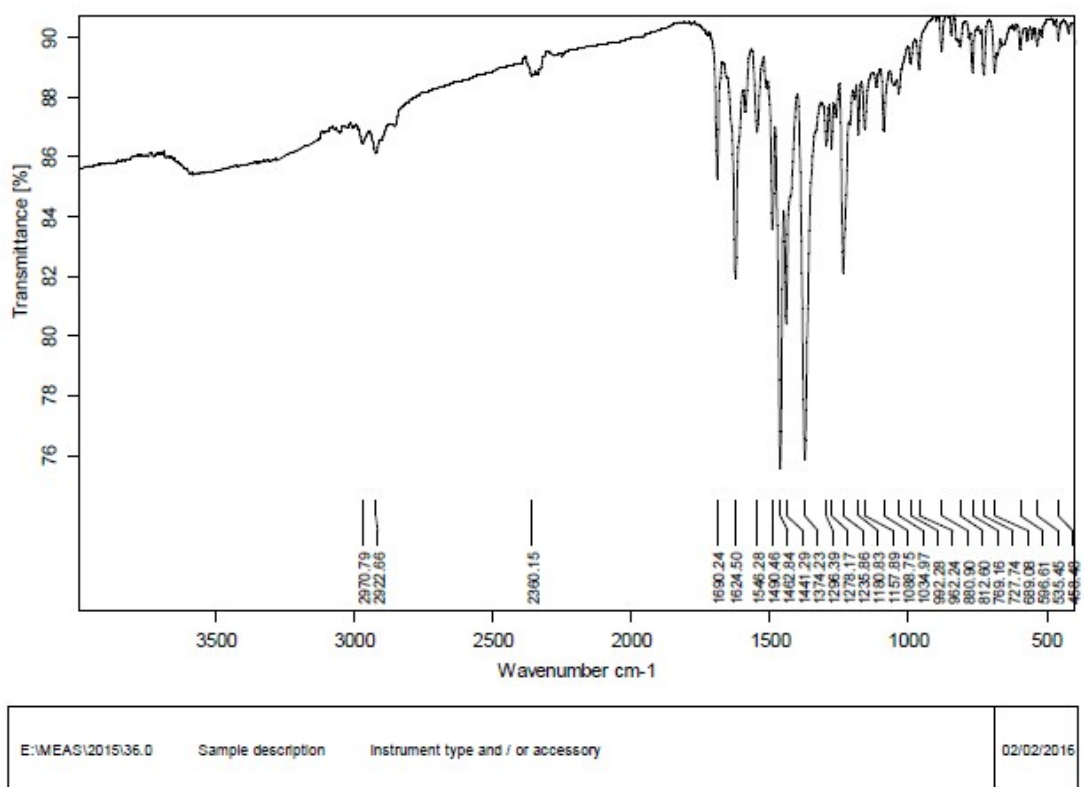

Figure 32 IR of 4g

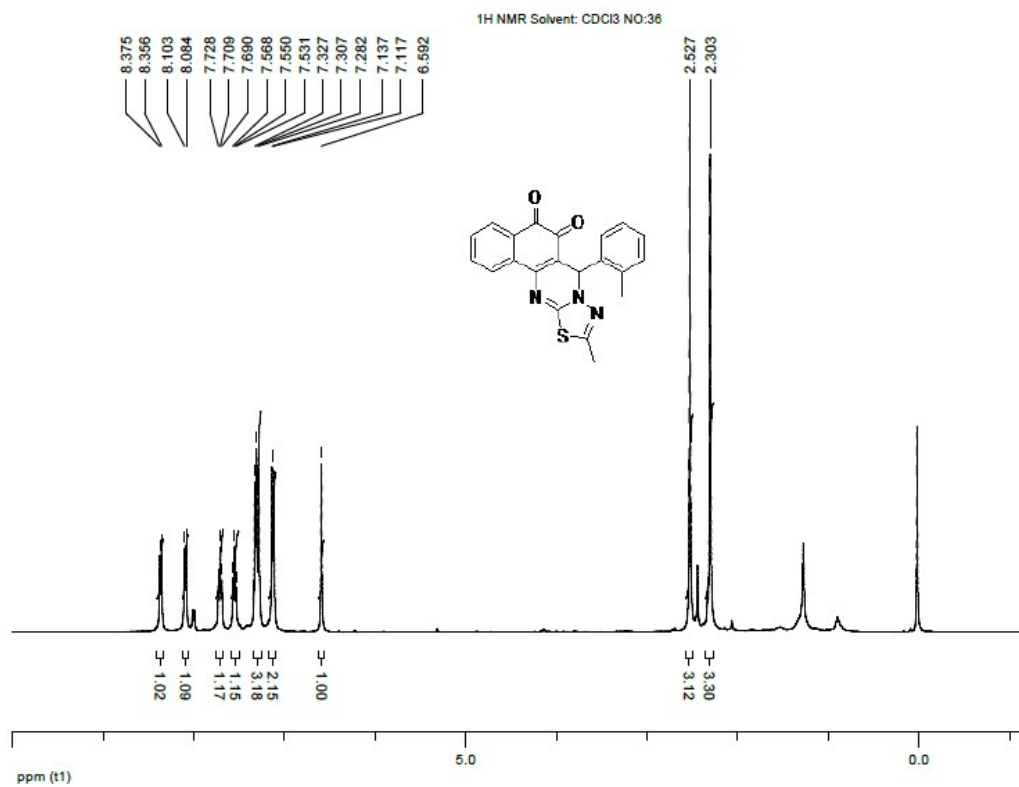

Figure 33 <sup>1</sup>H NMR of 4g

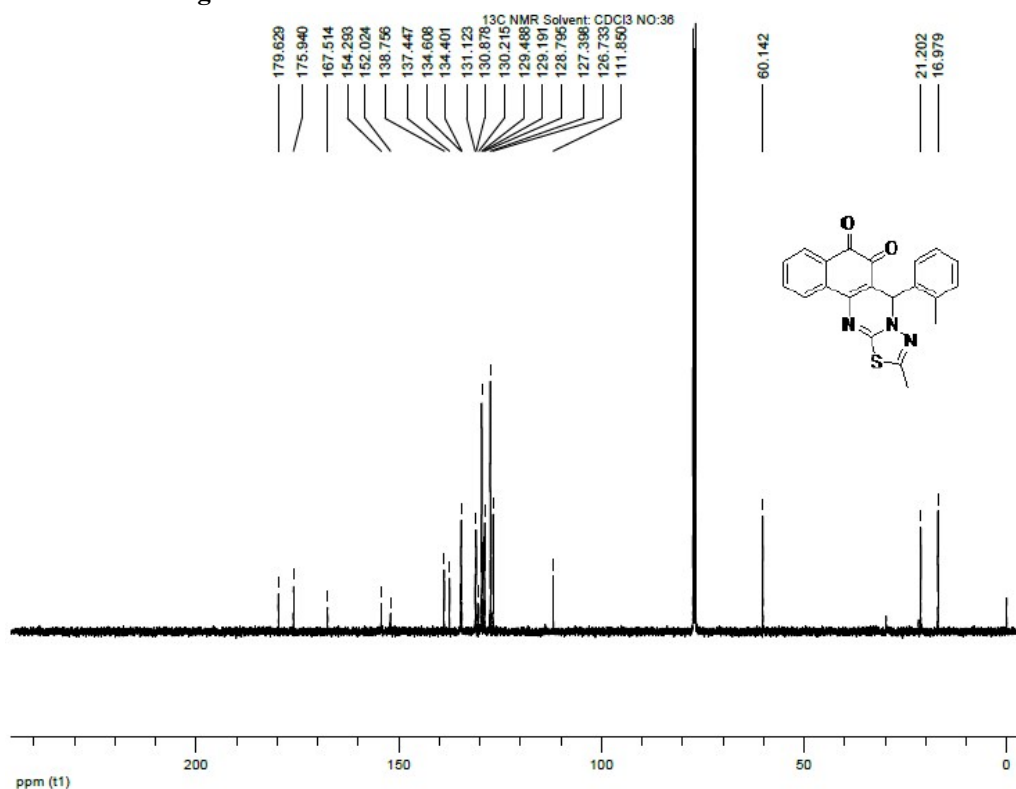

Figure 34 <sup>13</sup>C NMR of 4g

# Display Report

**Analysis Info**  
Analysis Name: D:\Data\wuliqiang\w-36.d  
Method: Tune\_pos\_low.m  
Sample Name: w-36  
Acquisition Date: 4/20/2015 9:54:51 AM  
Operator: zjx  
Instrument: micrOTOF-Q III 8228888.20494

**Acquisition Parameter**  
Source Type: ESI  
Focus: Not active  
Scan Begin: 50 m/z  
Scan End: 1000 m/z  
Ion Polarity: Positive  
Set Capillary: 4500 V  
Set End Plate Offset: -500 V  
Set Collision Cell RF: 120.0 Vpp  
Set Nebulizer: 0.3 Bar  
Set Dry Heater: 180 °C  
Set Dry Gas: 4.0 l/min  
Set Divert Valve: Waste

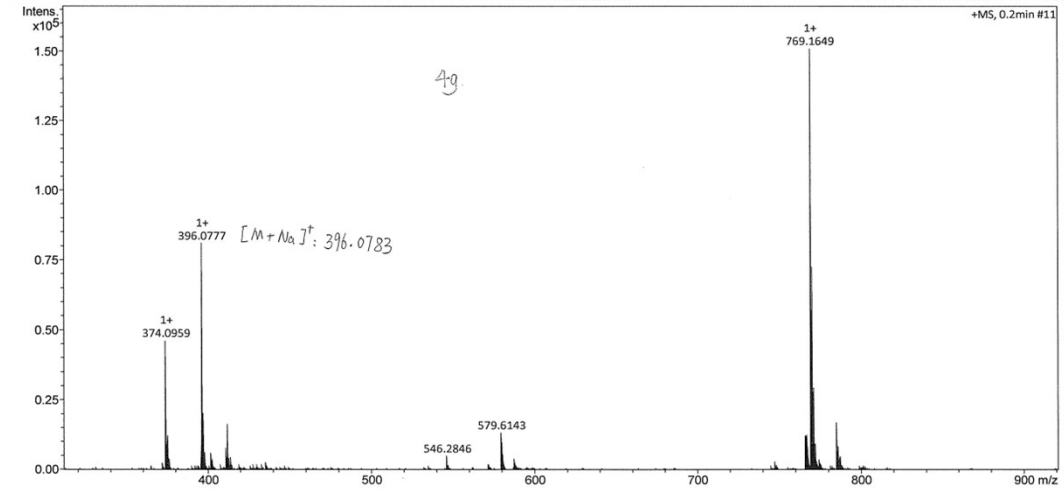

Bruker Compass DataAnalysis 4.2 printed: 4/20/2015 10:31:28 AM by: zjx Page 1 of 1

Figure 35 HRMS of 4g

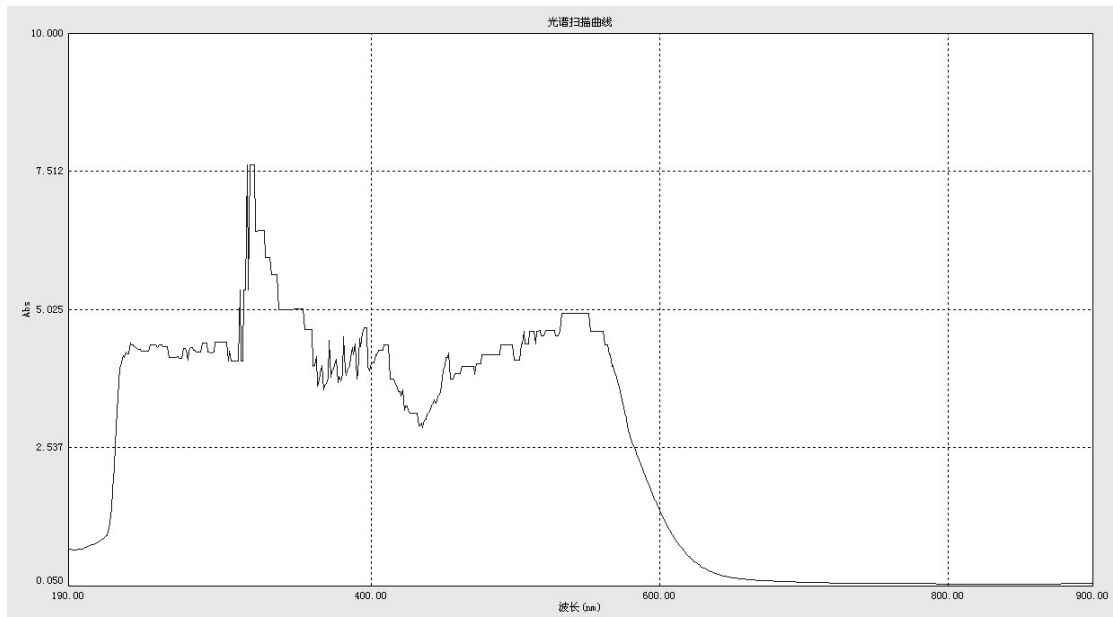

Figure 36 UV-vis of 4h

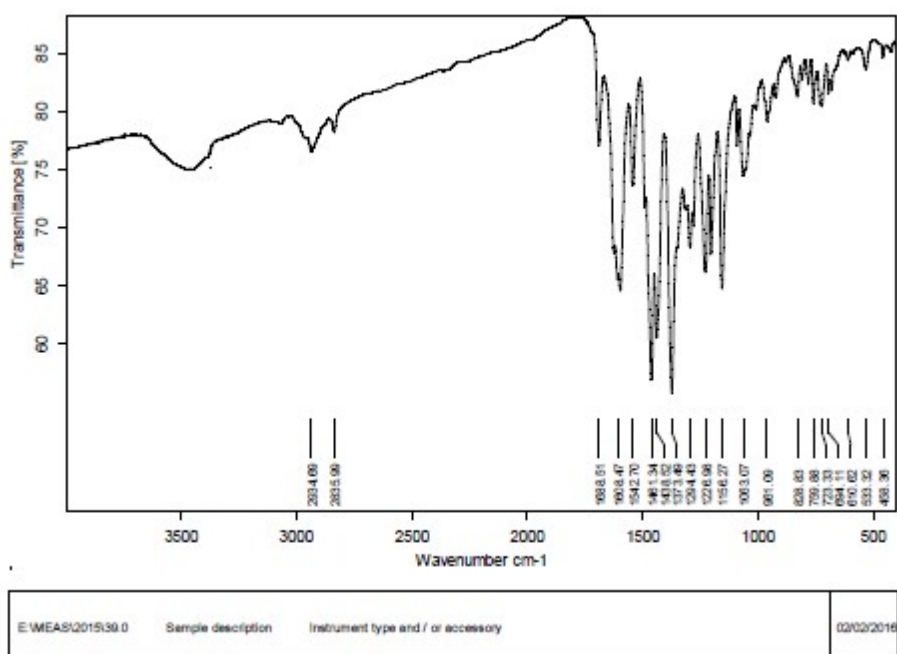

Figure 37 IR of 4h

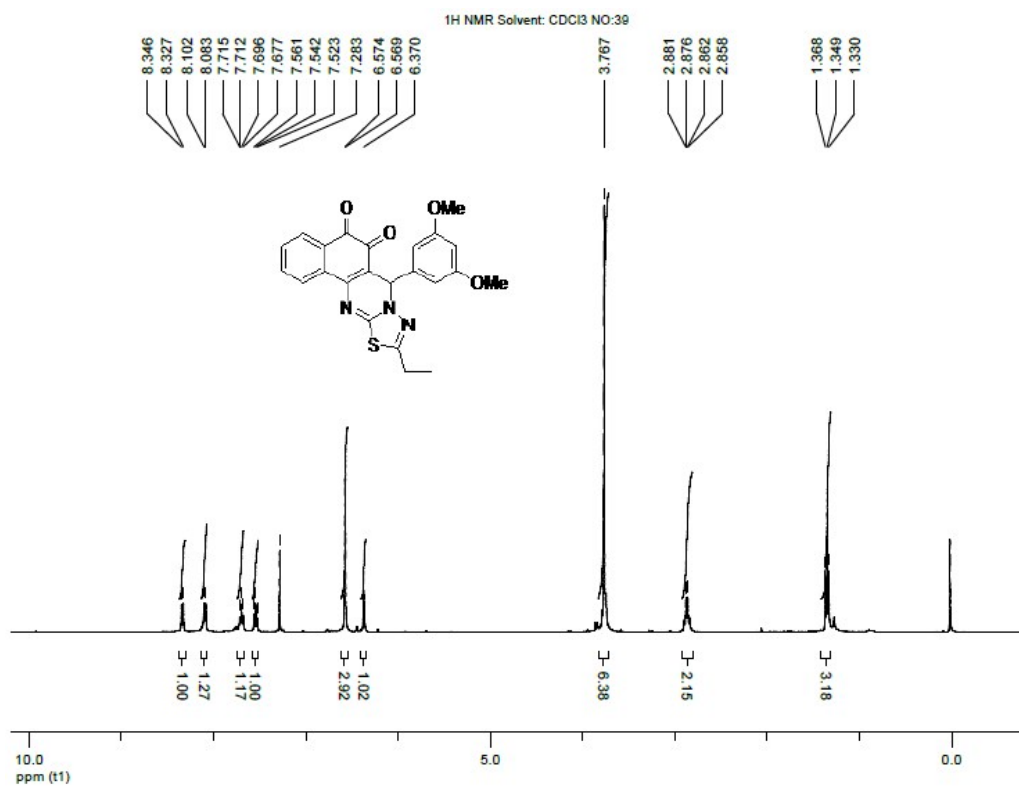

Figure 38 <sup>1</sup>H NMR of 4h

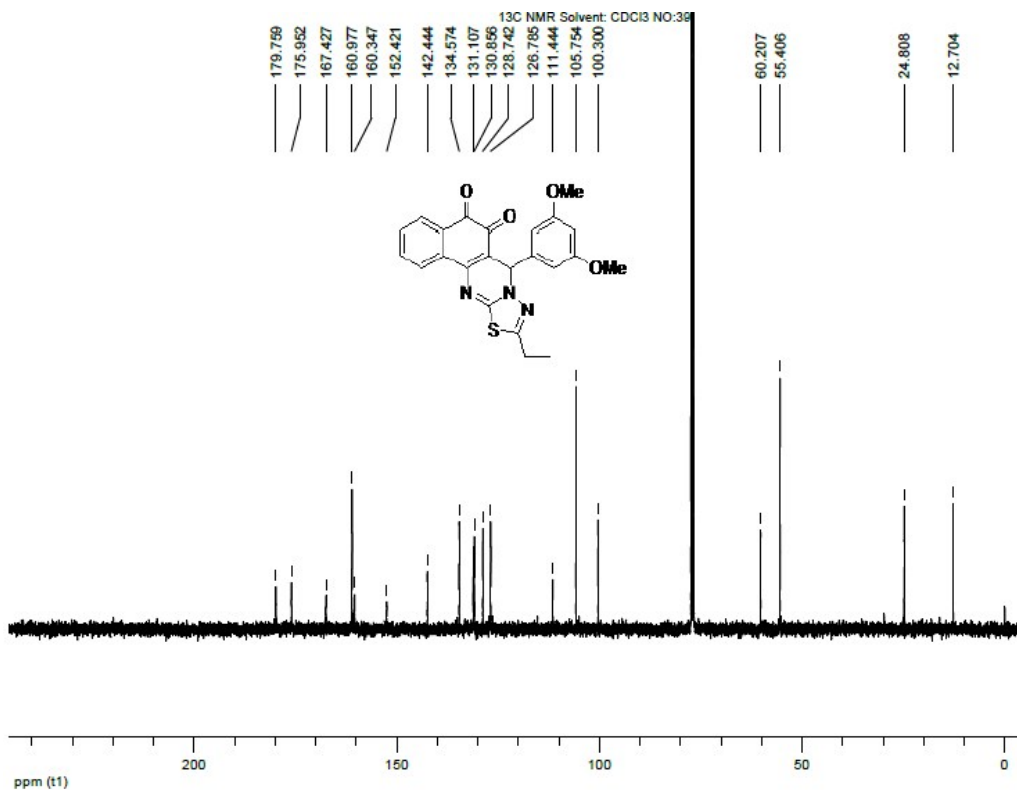

Figure 39 <sup>13</sup>C NMR of 4h

### Display Report

| Analysis Info         |                          | Acquisition Date      |           | 4/20/2015 9:14:49 AM |                |
|-----------------------|--------------------------|-----------------------|-----------|----------------------|----------------|
| Analysis Name         | D:\Data\wuliqiang\w-39.d | Operator              | zjx       | Instrument           | micrOTOF-Q III |
| Method                | Tune_pos_low.m           |                       |           |                      | 8228888.20494  |
| Sample Name           | w-39                     |                       |           |                      |                |
| Comment               |                          |                       |           |                      |                |
| Acquisition Parameter |                          |                       |           |                      |                |
| Source Type           | ESI                      | Ion Polarity          | Positive  | Set Nebulizer        | 0.3 Bar        |
| Focus                 | Not active               | Set Capillary         | 4500 V    | Set Dry Heater       | 180 °C         |
| Scan Begin            | 50 m/z                   | Set End Plate Offset  | -500 V    | Set Dry Gas          | 4.0 l/min      |
| Scan End              | 1000 m/z                 | Set Collision Cell RF | 120.0 Vpp | Set Divert Valve     | Waste          |

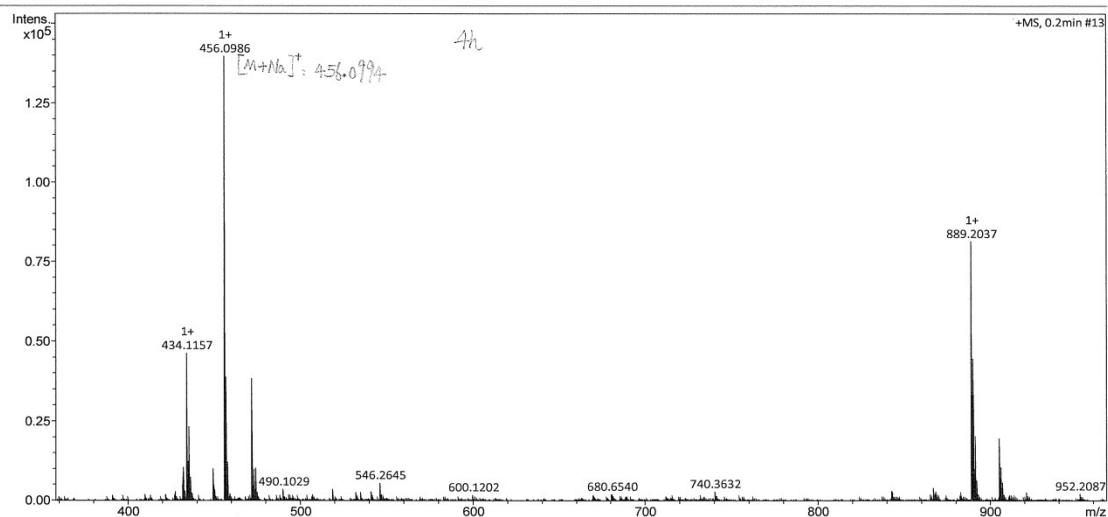

Figure 40 HRMS of 4h

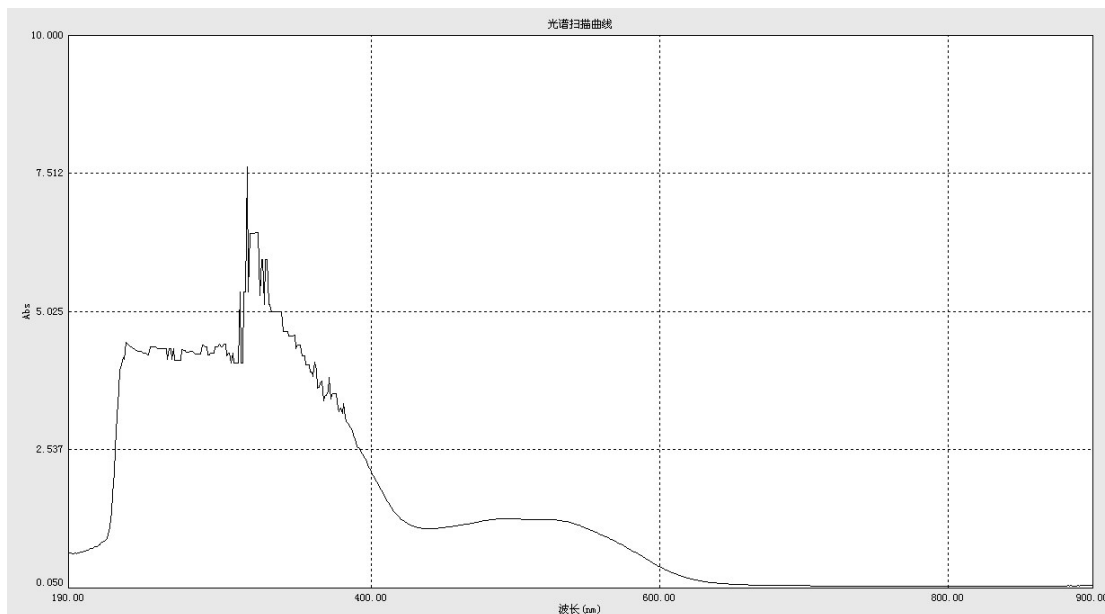

Figure 41 UV-vis of 4i

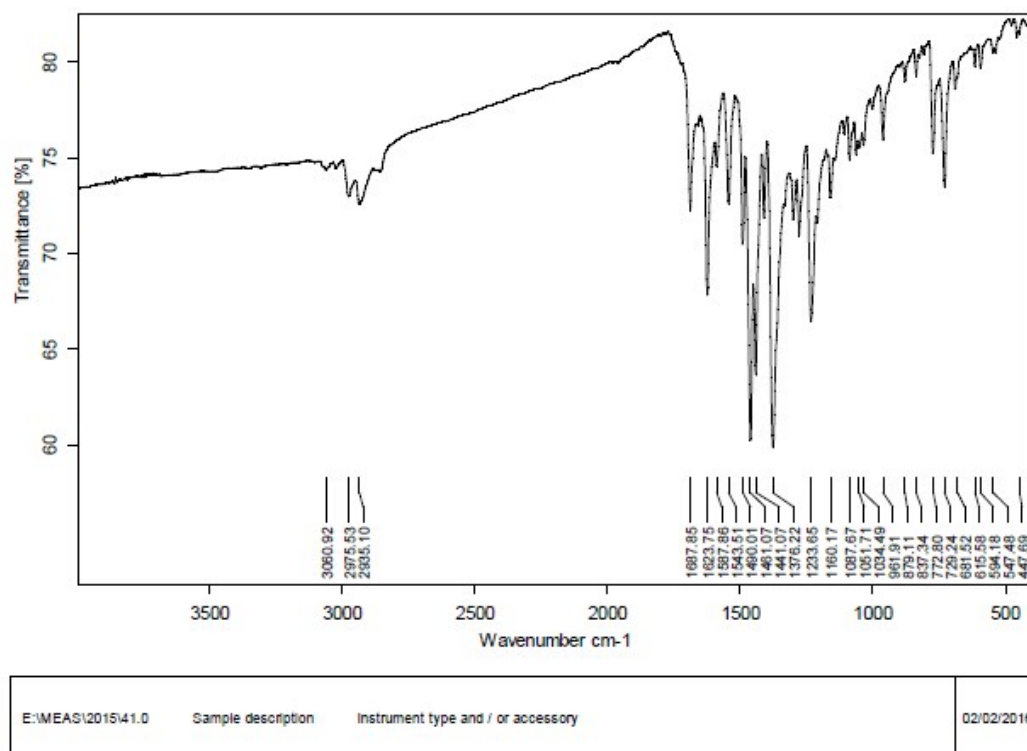

Figure 42 IR of 4i

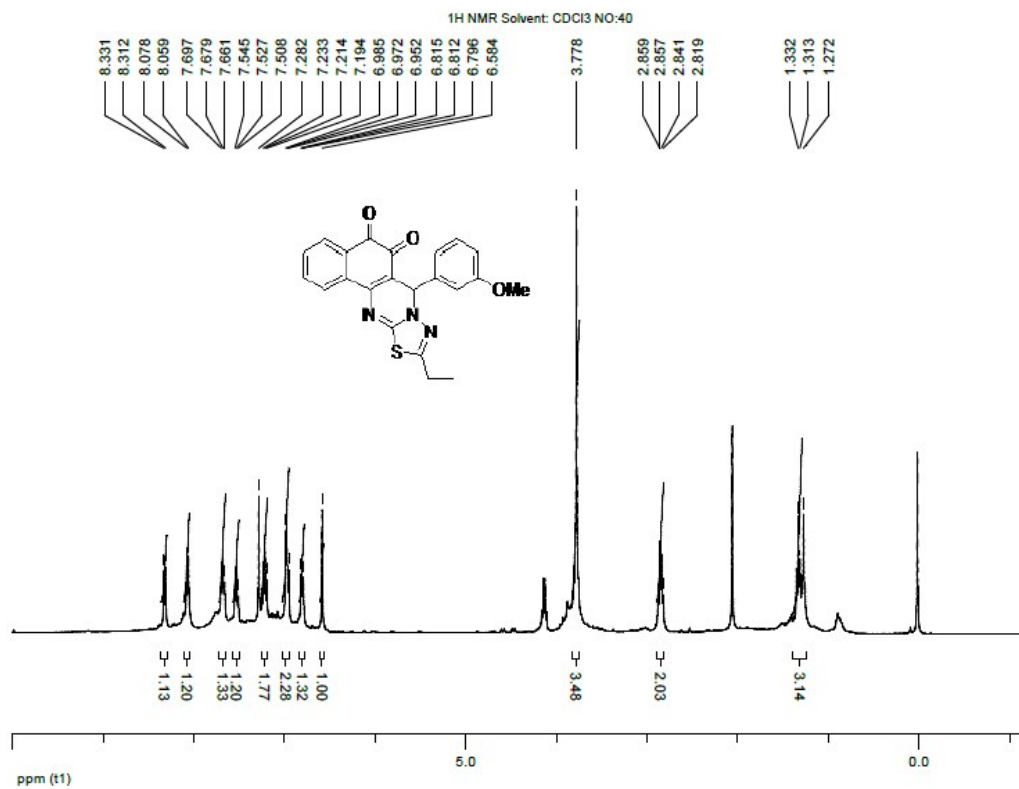

Figure 43  $^1\text{H}$  NMR of 4i

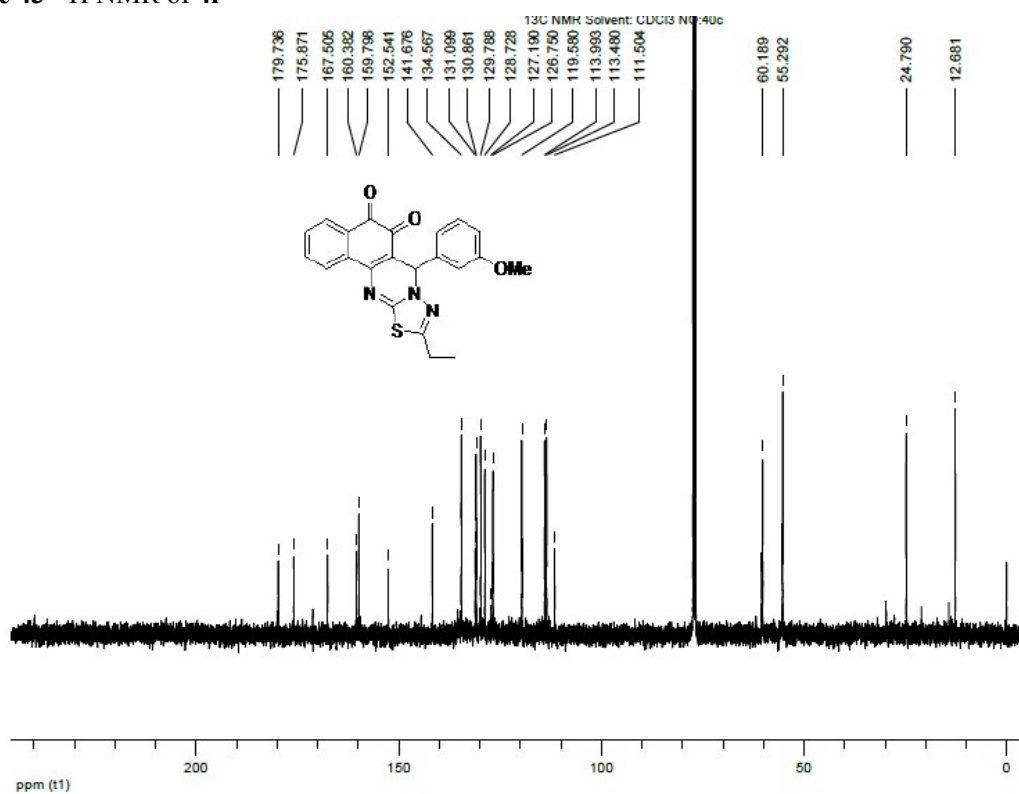

Figure 44  $^{13}\text{C}$  NMR of 4i

## Display Report

|                                                                                                                            |                                                                                                     |
|----------------------------------------------------------------------------------------------------------------------------|-----------------------------------------------------------------------------------------------------|
| <b>Analysis Info</b><br>Analysis Name: D:\Data\wuliqiang\w-40.d<br>Method: Tune_pos_low.m<br>Sample Name: w-40<br>Comment: | Acquisition Date: 4/20/2015 9:42:37 AM<br>Operator: zjx<br>Instrument: micrOTOF-Q III 8228888.20494 |
|----------------------------------------------------------------------------------------------------------------------------|-----------------------------------------------------------------------------------------------------|

|                              |            |                       |           |                  |           |
|------------------------------|------------|-----------------------|-----------|------------------|-----------|
| <b>Acquisition Parameter</b> |            |                       |           |                  |           |
| Source Type                  | ESI        | Ion Polarity          | Positive  | Set Nebulizer    | 0.3 Bar   |
| Focus                        | Not active | Set Capillary         | 4500 V    | Set Dry Heater   | 180 °C    |
| Scan Begin                   | 50 m/z     | Set End Plate Offset  | -500 V    | Set Dry Gas      | 4.0 l/min |
| Scan End                     | 1000 m/z   | Set Collision Cell RF | 120.0 Vpp | Set Divert Valve | Waste     |

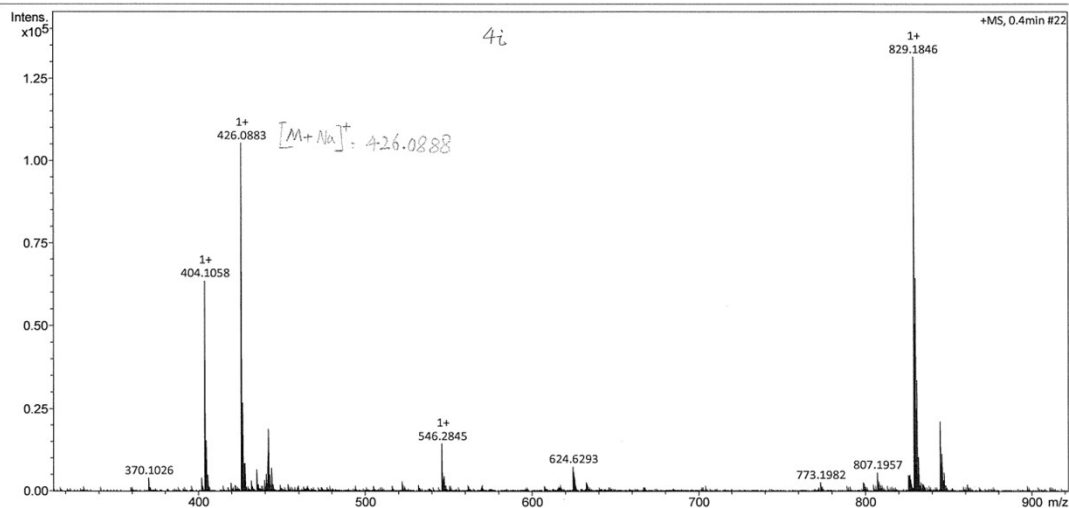

Bruker Compass DataAnalysis 4.2      printed: 4/20/2015 10:35:10 AM      by: zjx      Page 1 of 1

**Figure 45** HRMS of 4i

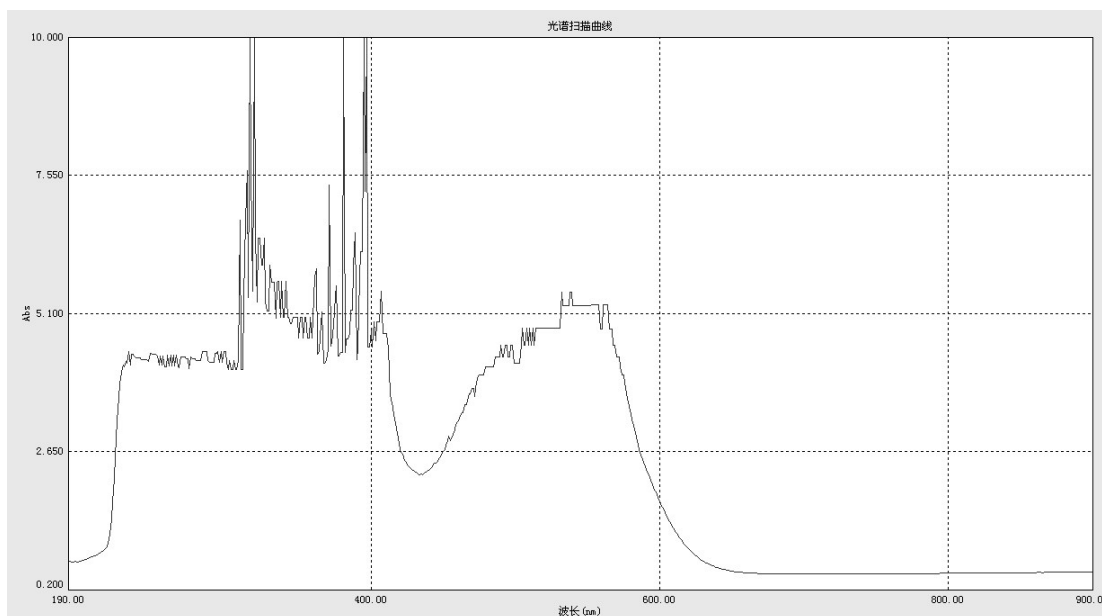

**Figure 46** UV-vis of 4j



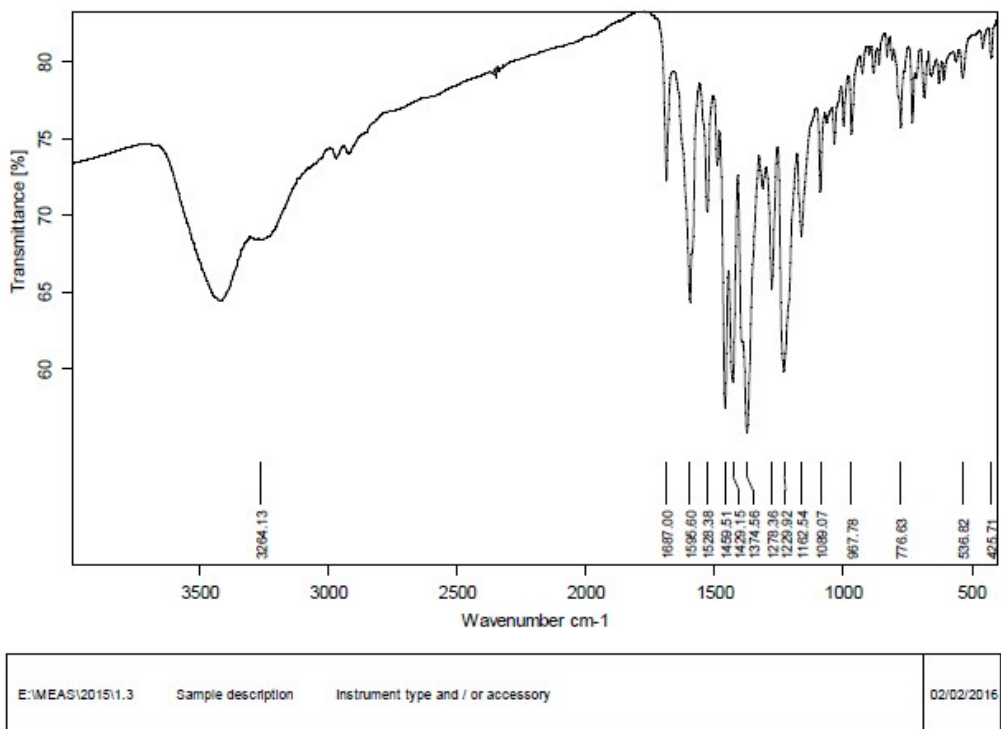

Figure 47 IR of 4j

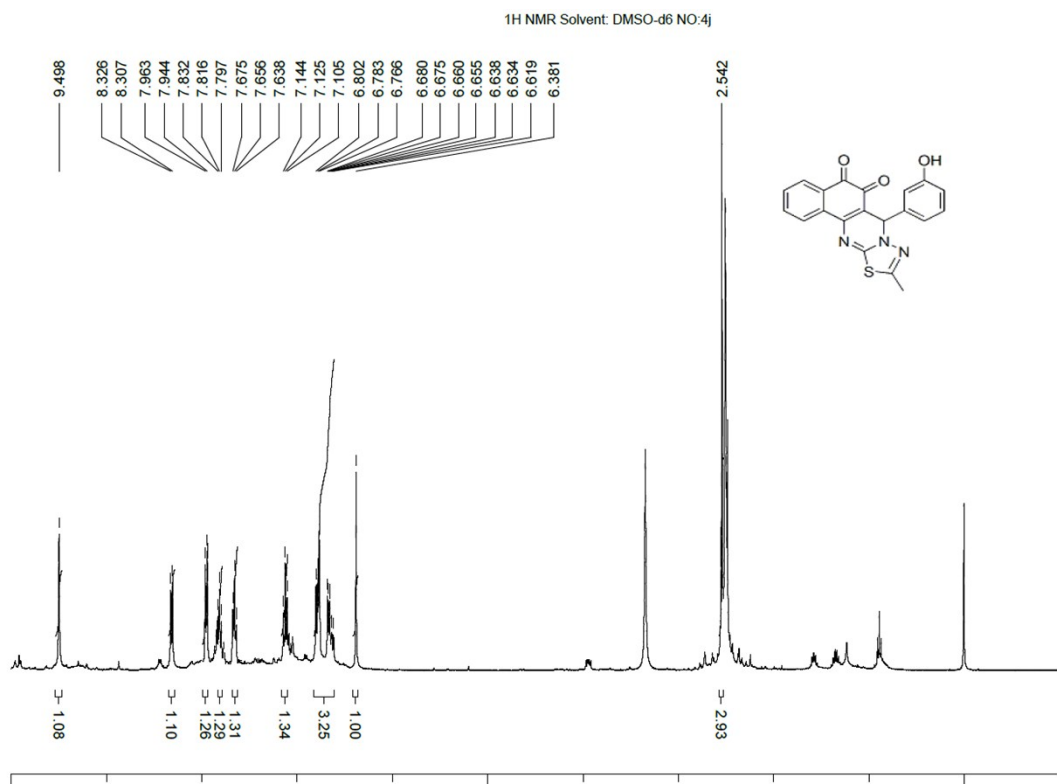

Figure 48 <sup>1</sup>H NMR of 4j

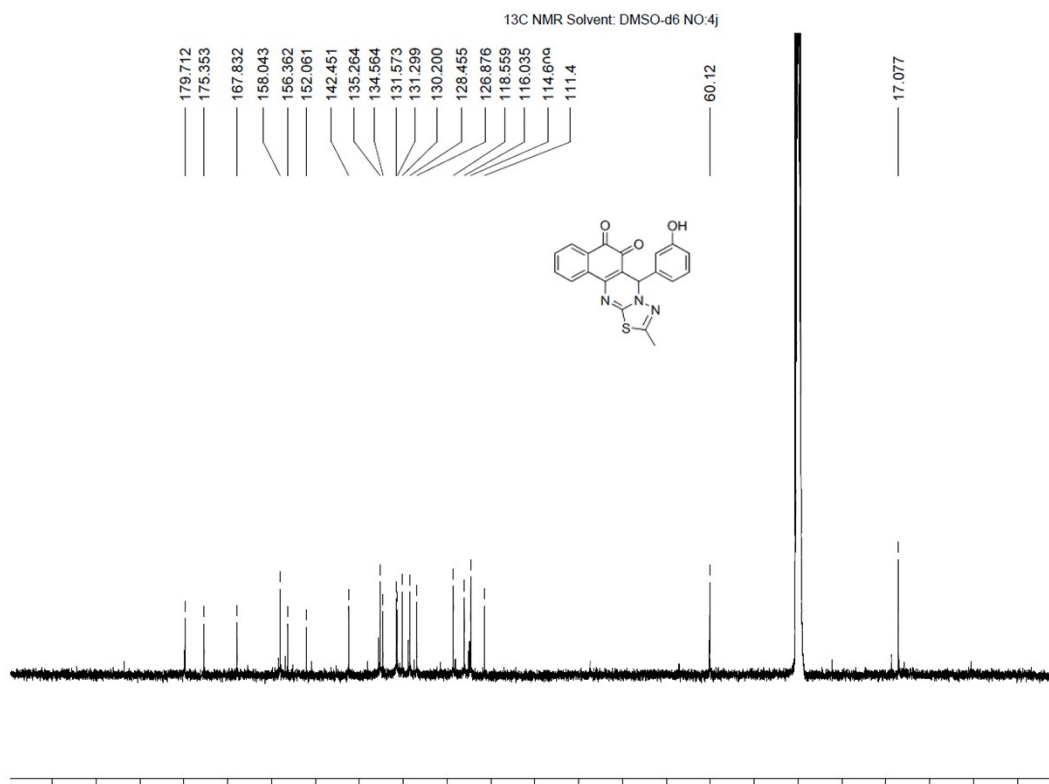

Figure 49 <sup>13</sup>C NMR of 4j

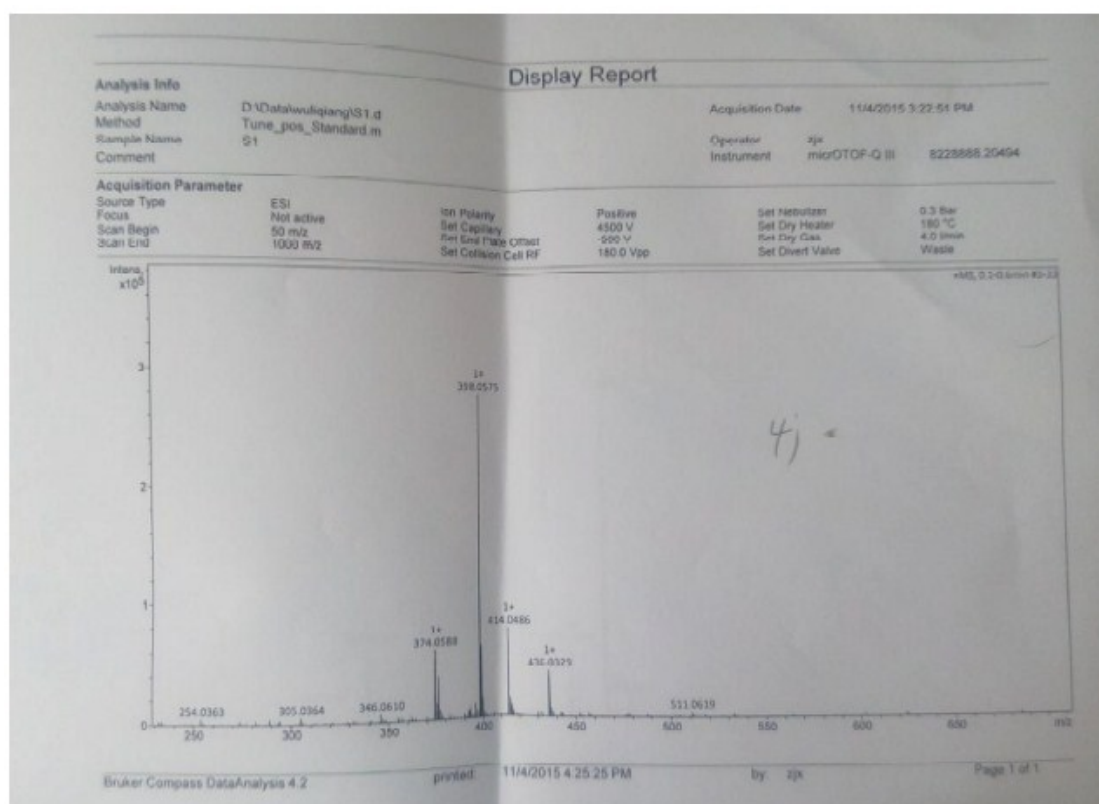

Figure 50 HRMS of 4j

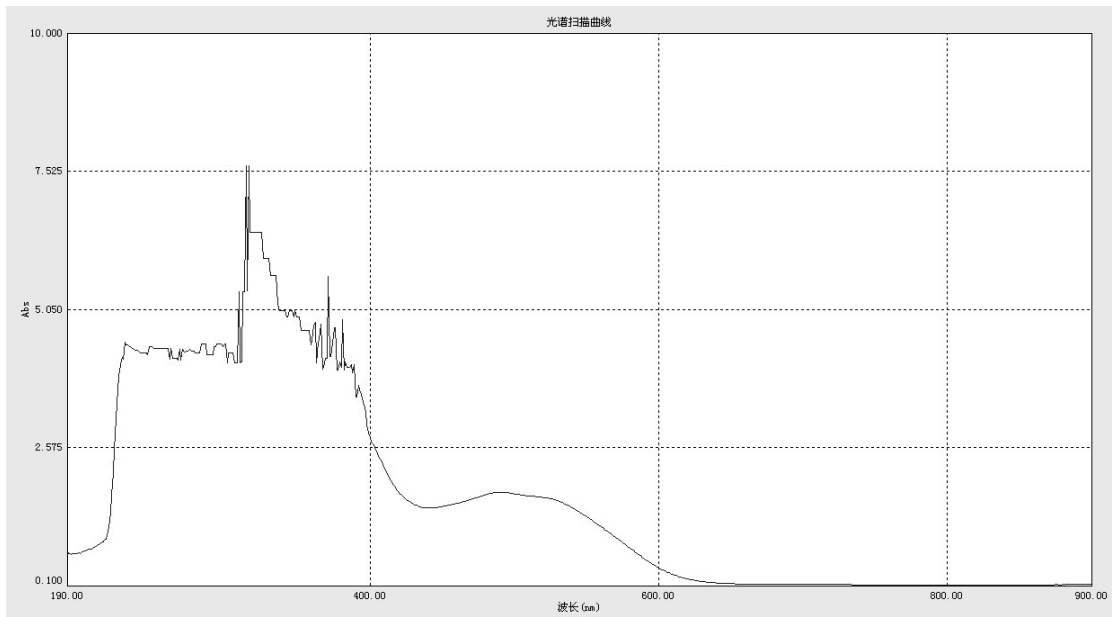

Figure 51 UV-vis of 4k

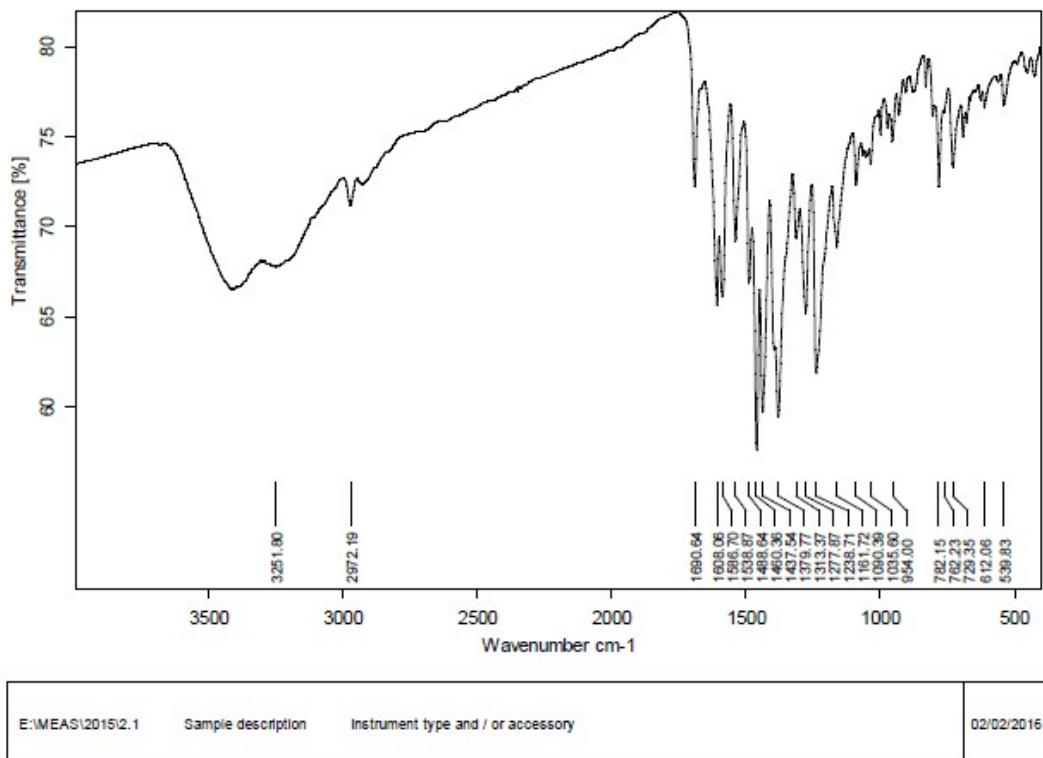

Figure 52 IRof 4k

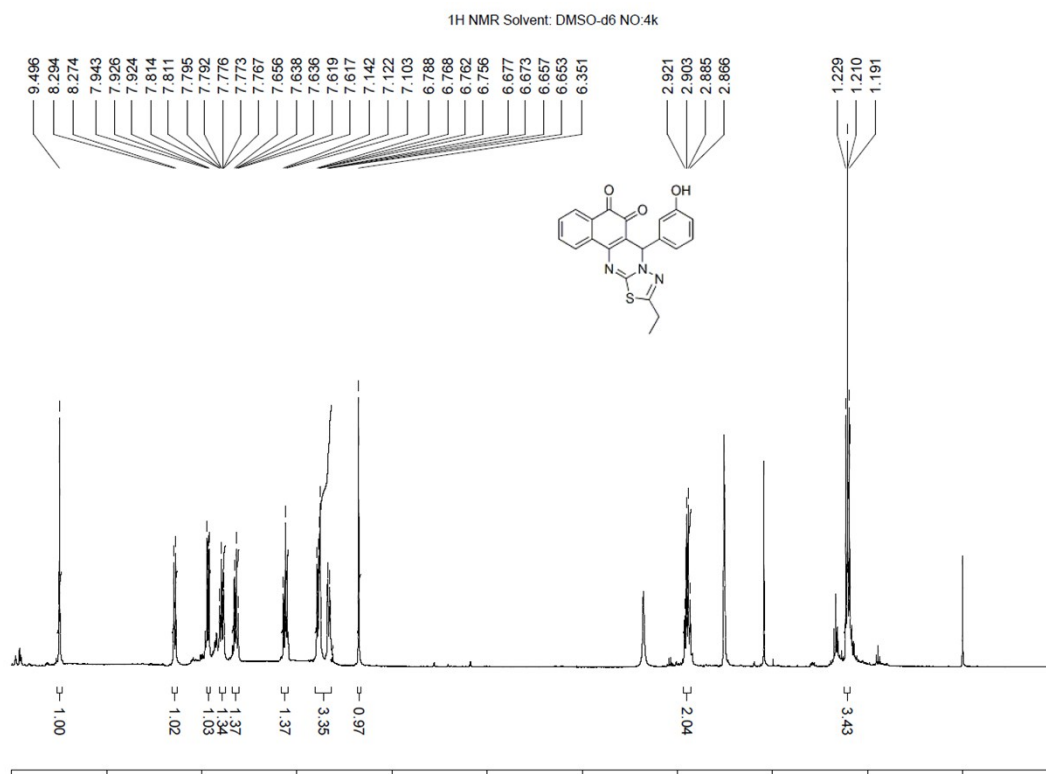

Figure 53 <sup>1</sup>H NMR of 4k

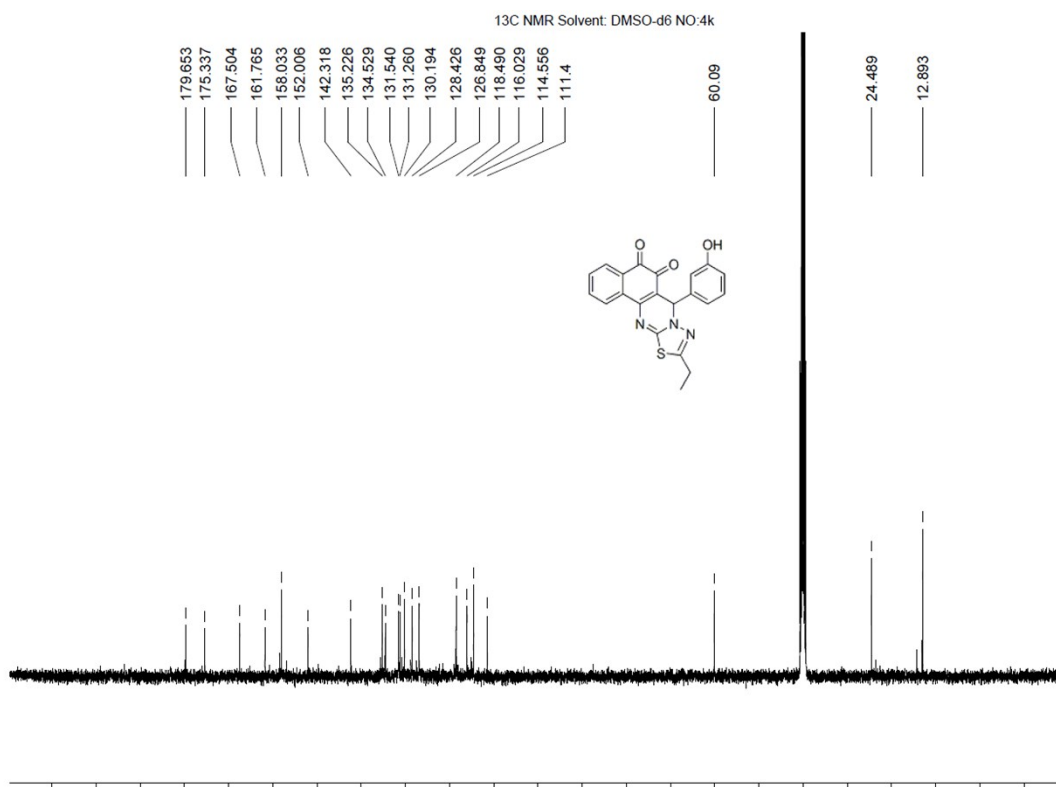

Figure 54 <sup>13</sup>C NMR of 4k

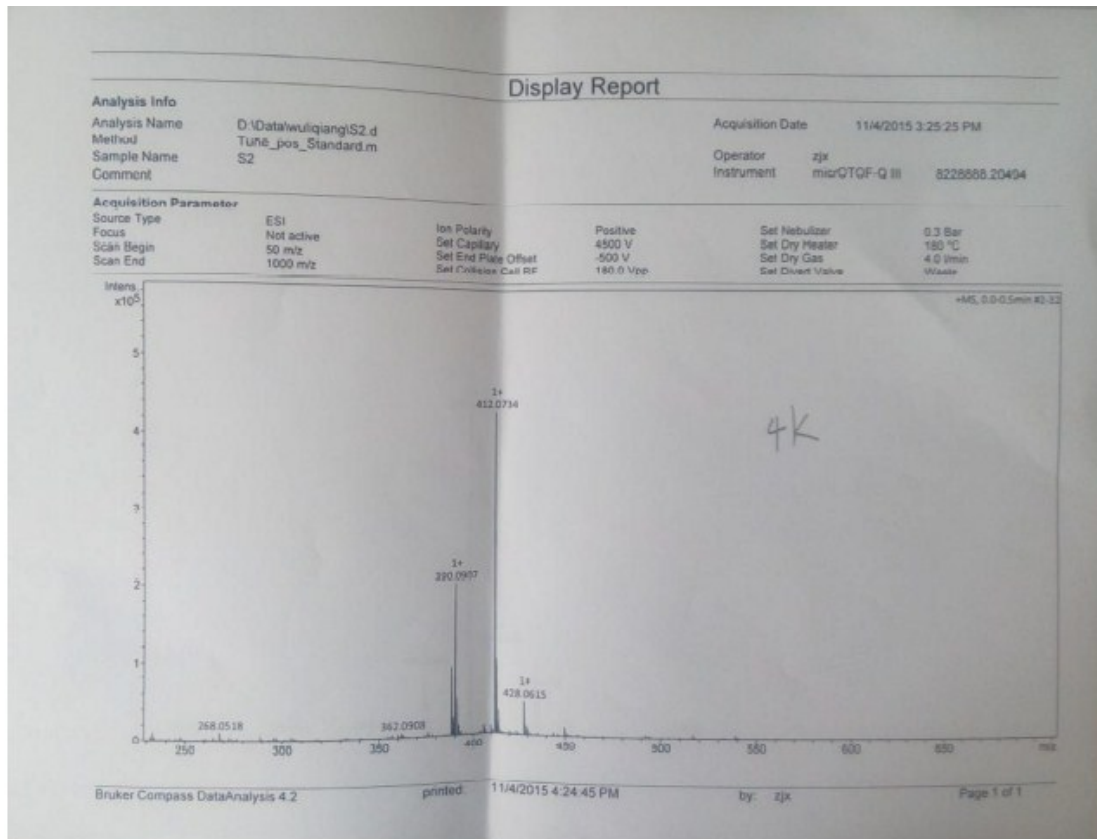

**Figure 55** HRMS of 4k

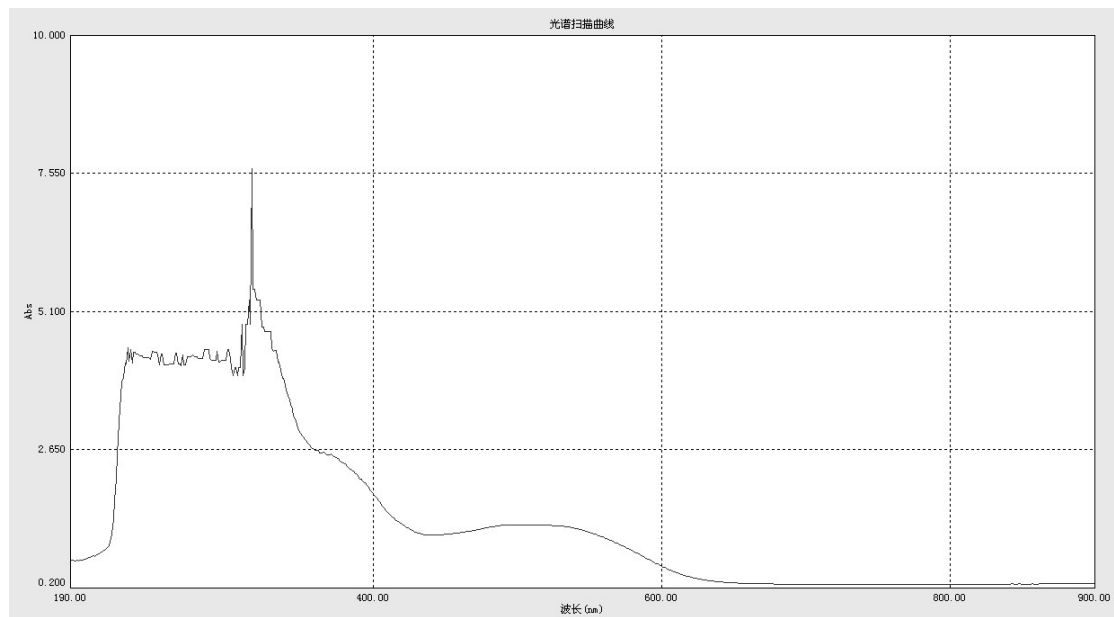

**Figure 56** UV-vis of 4l

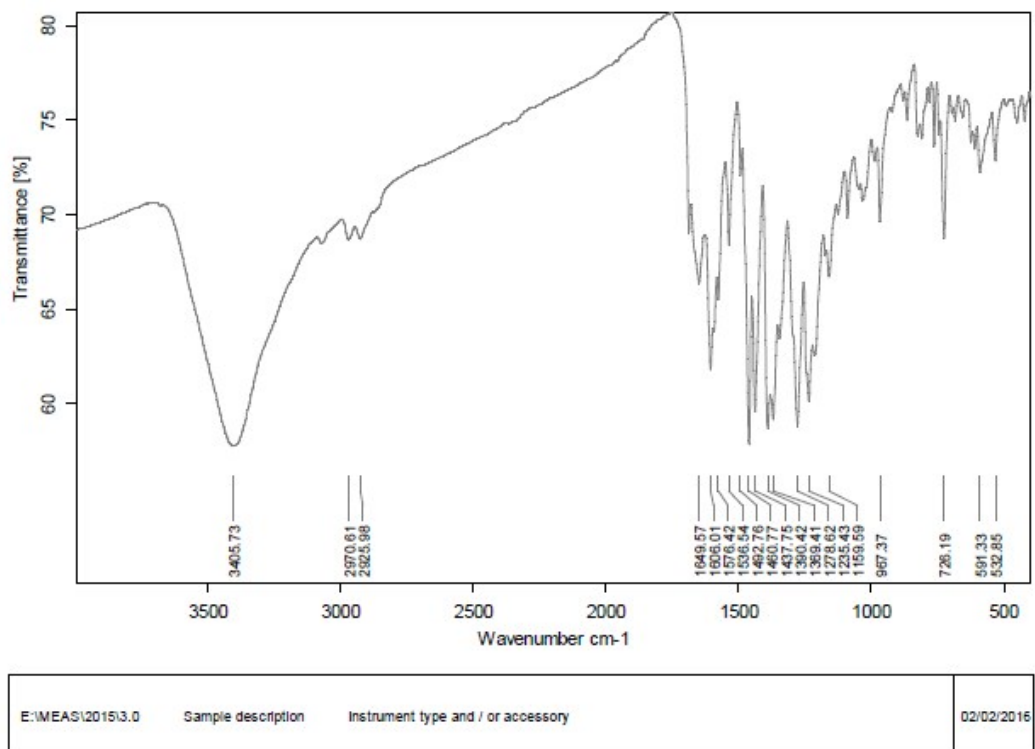

Figure 57 IR of 41

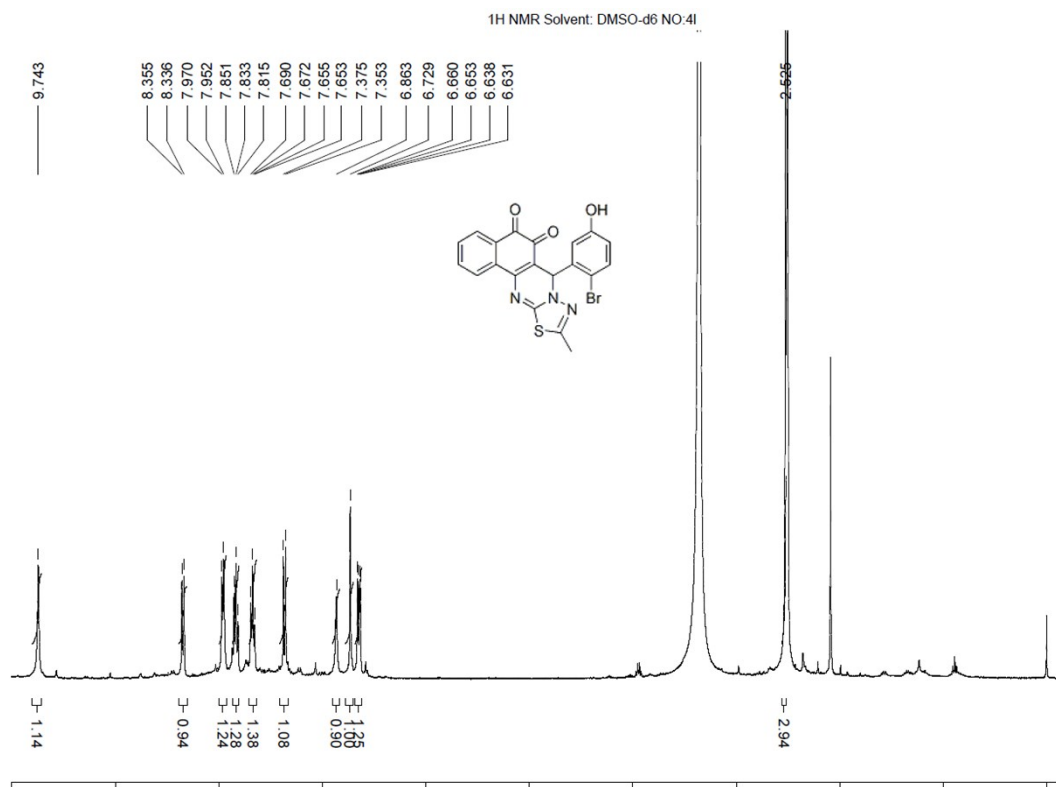

Figure 58 <sup>1</sup>H NMR of 41

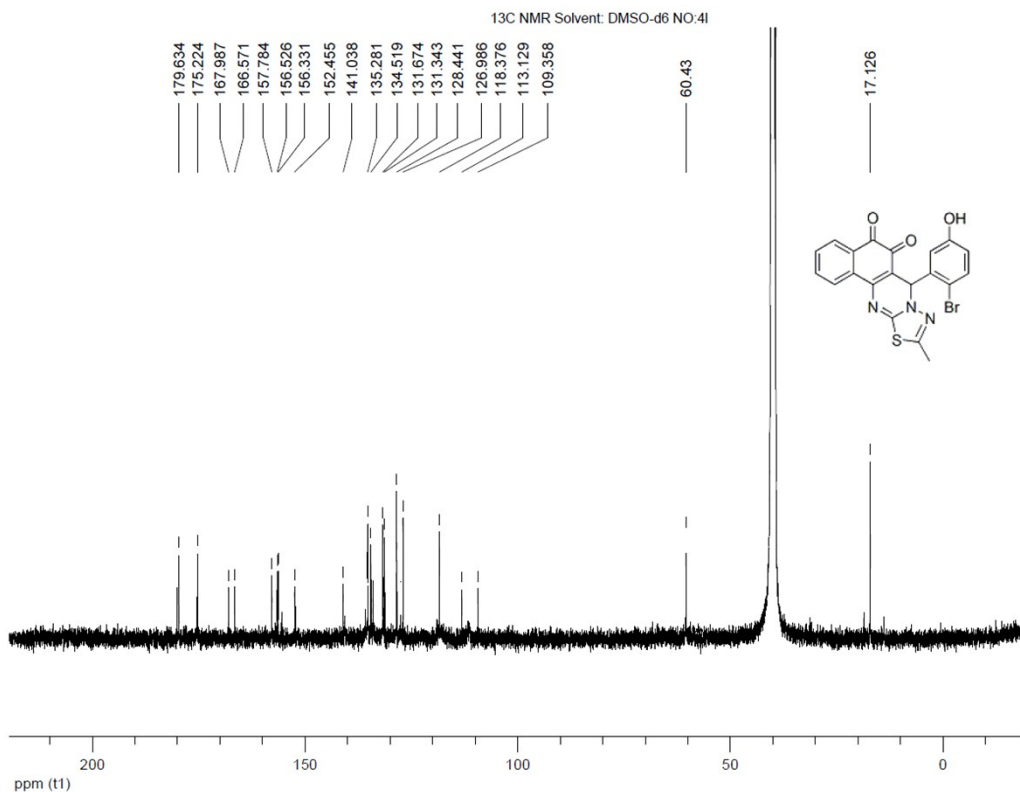

Figure 59 <sup>13</sup>C NMR of 4l

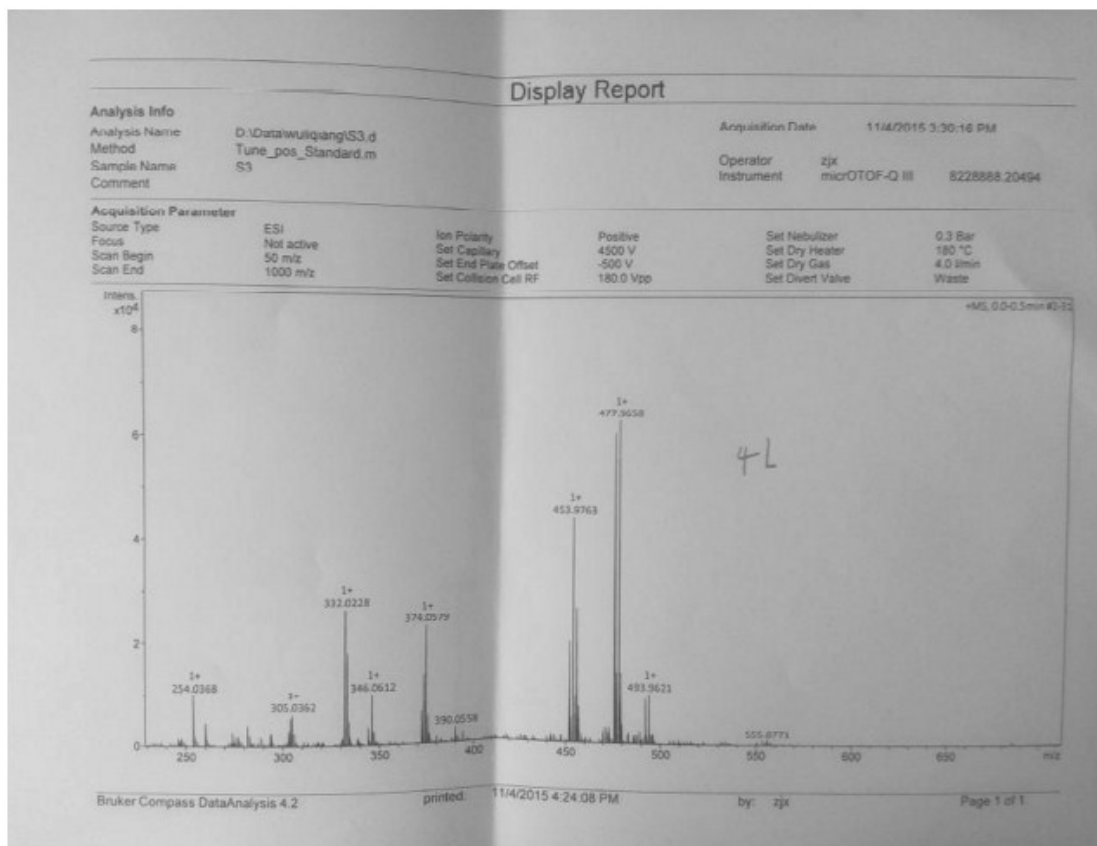

Figure 60 HRMS of 4l

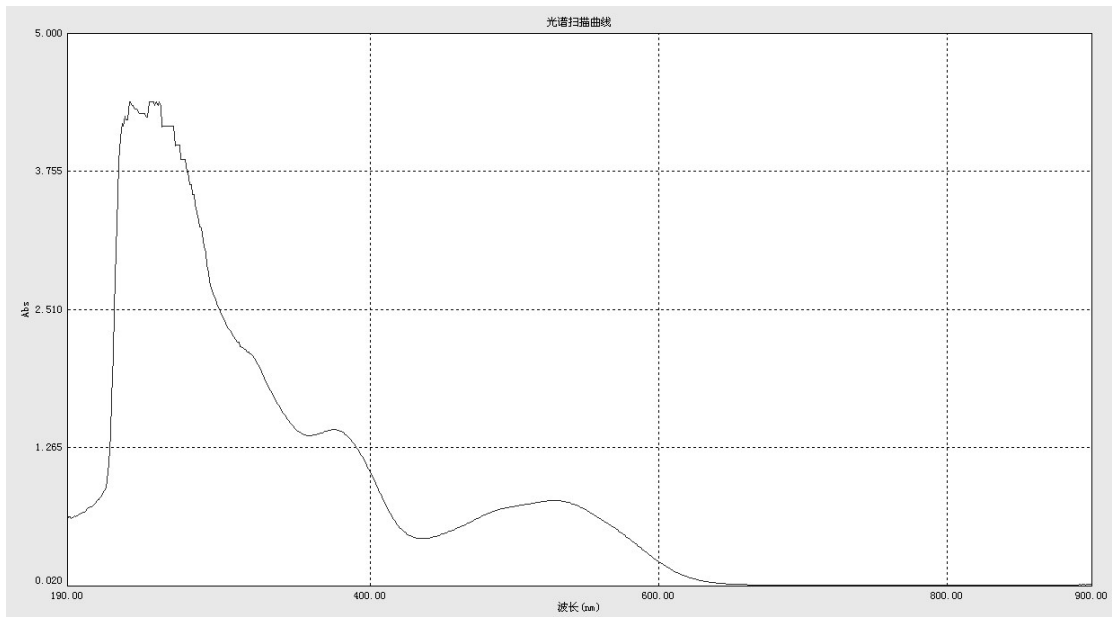

Figure 61 UV-vis of 4m

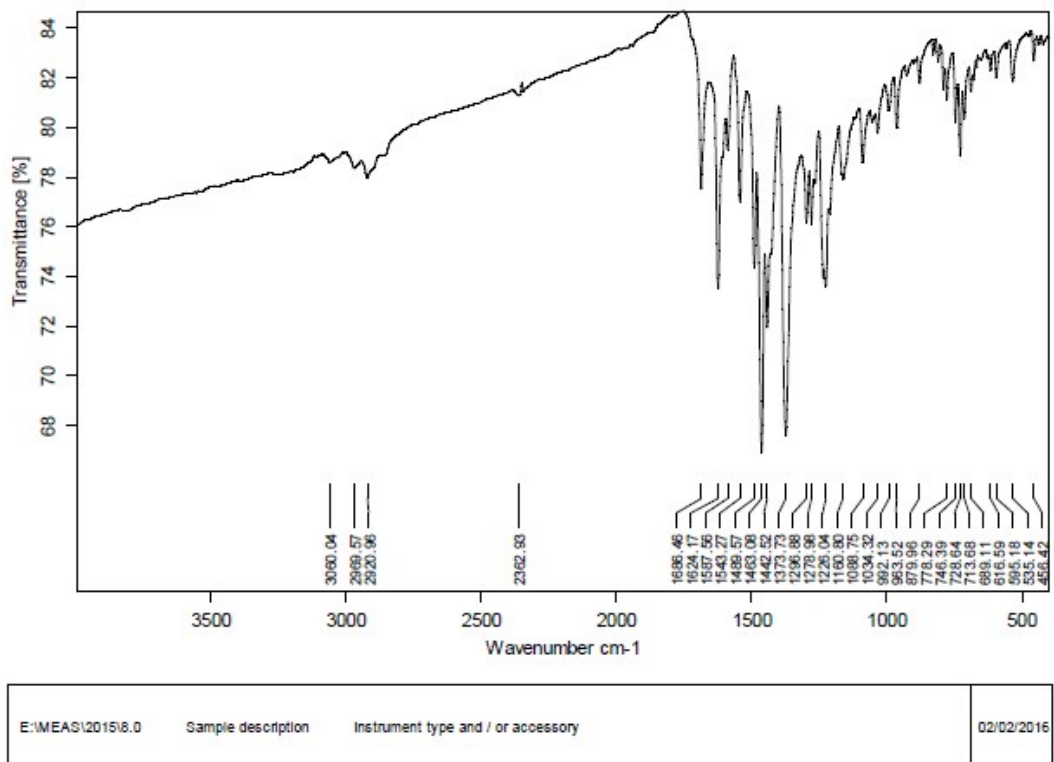

Figure 62 IR of 4m



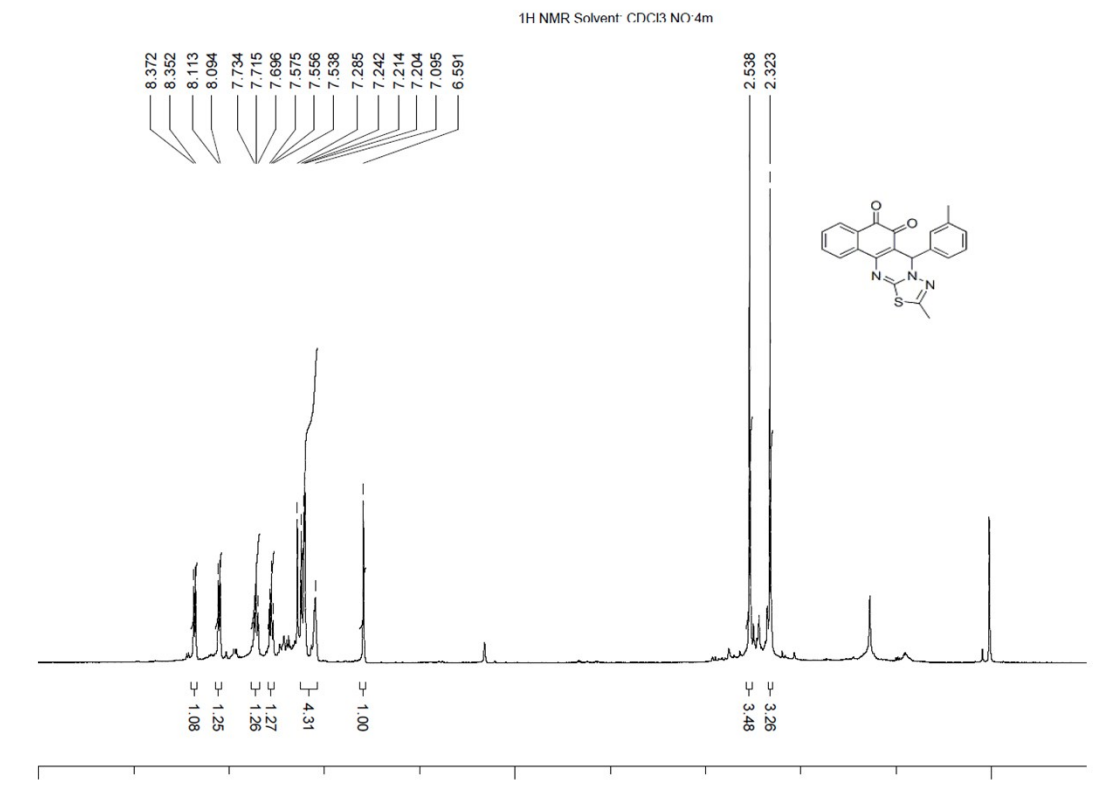

Figure 63  $^1\text{H}$  NMR of 4m

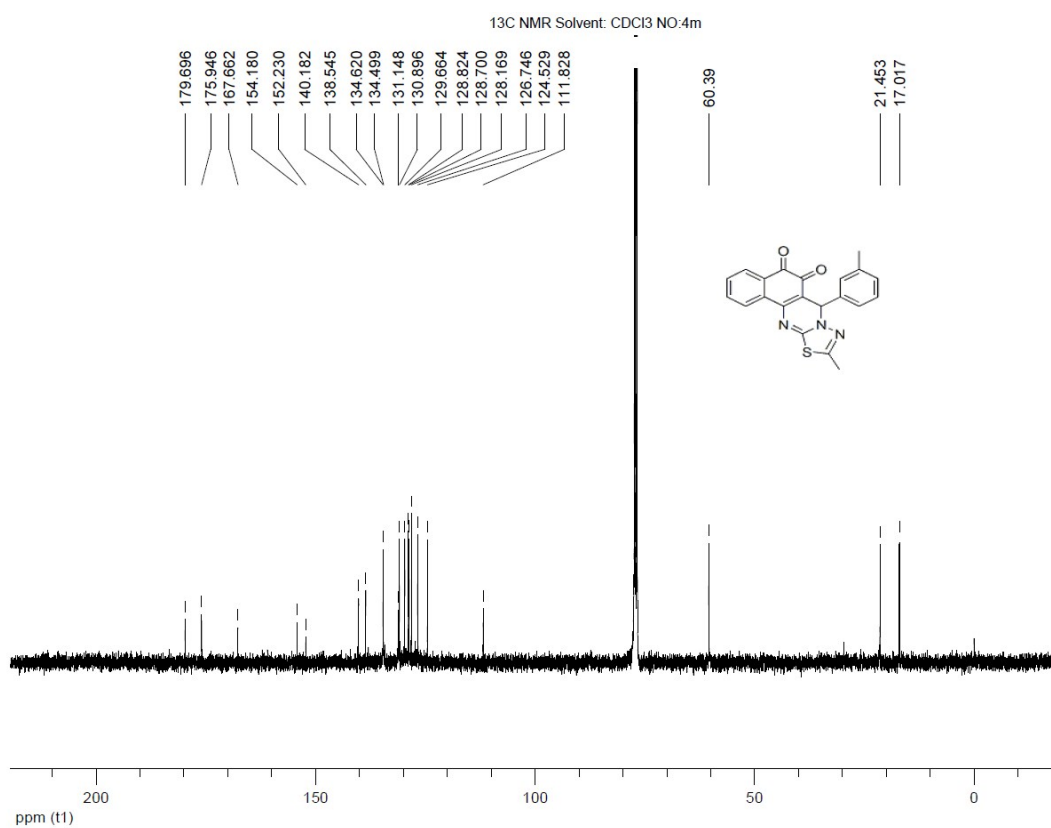

Figure 64  $^{13}\text{C}$  NMR of 4m

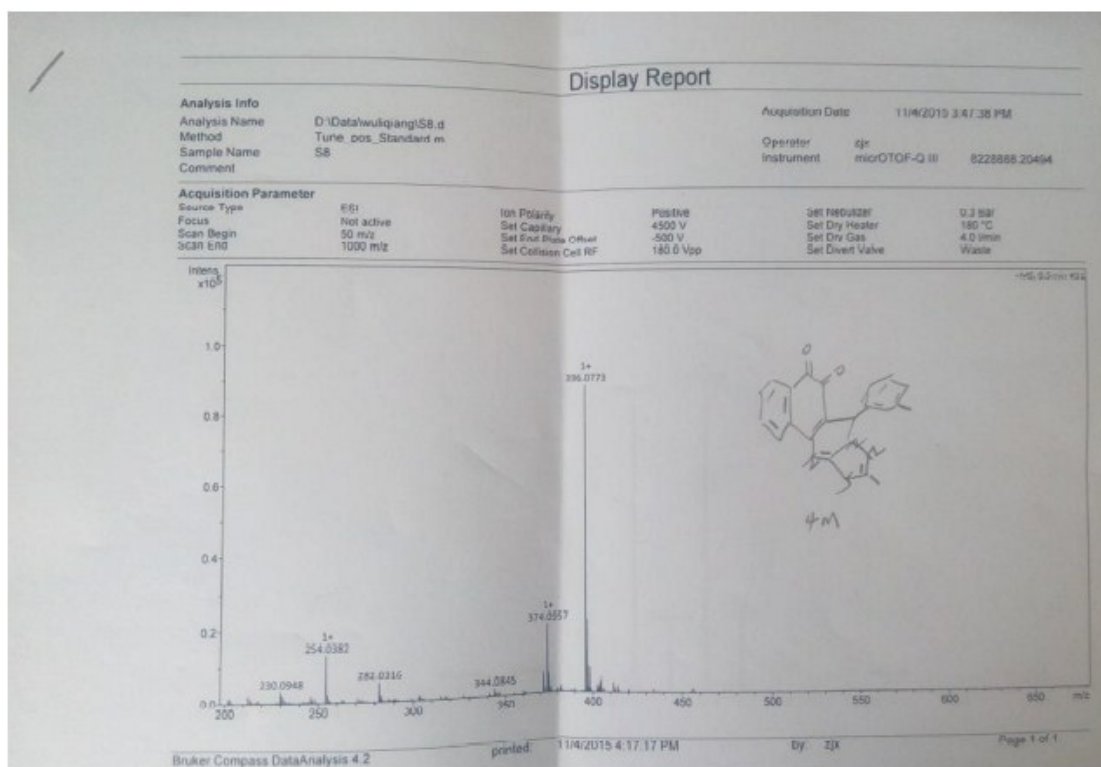

**Figure 65** HRMS of **4m**

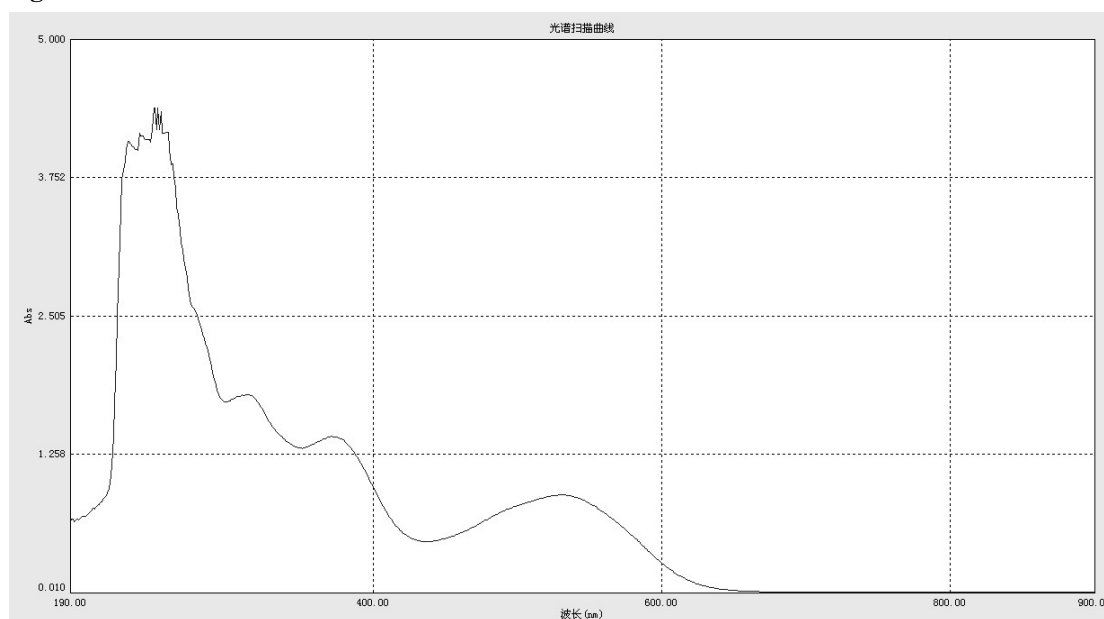

**Figure 66** UV-vis of **4n**

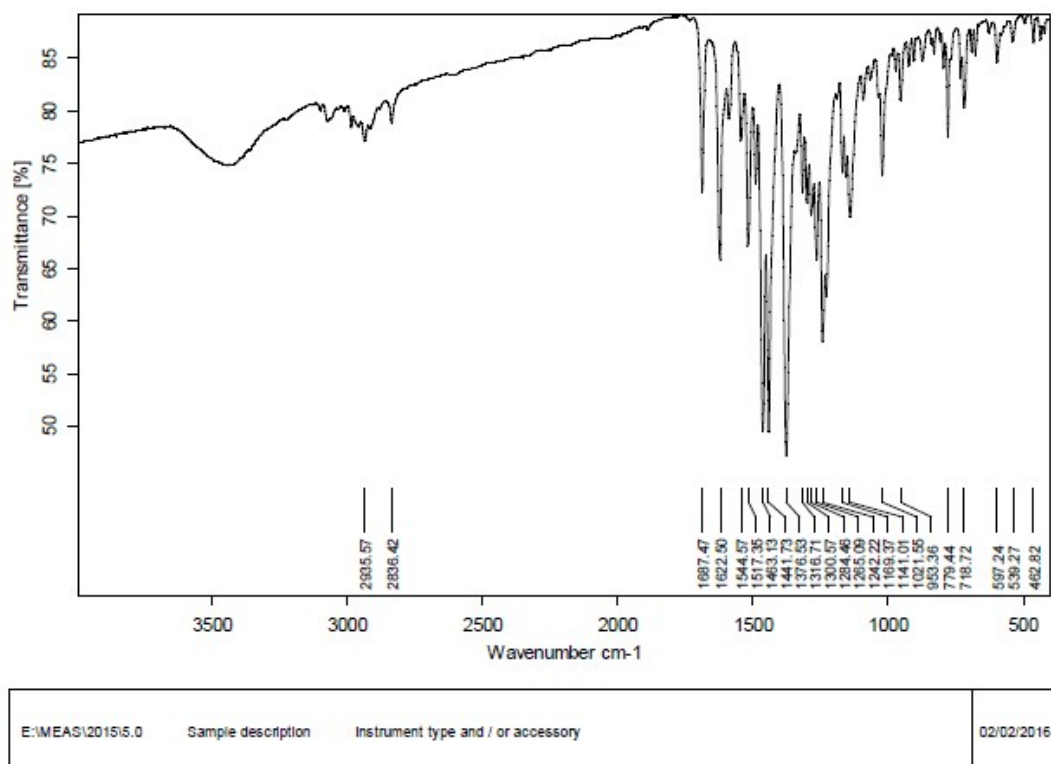

Figure 67 IR of 4n

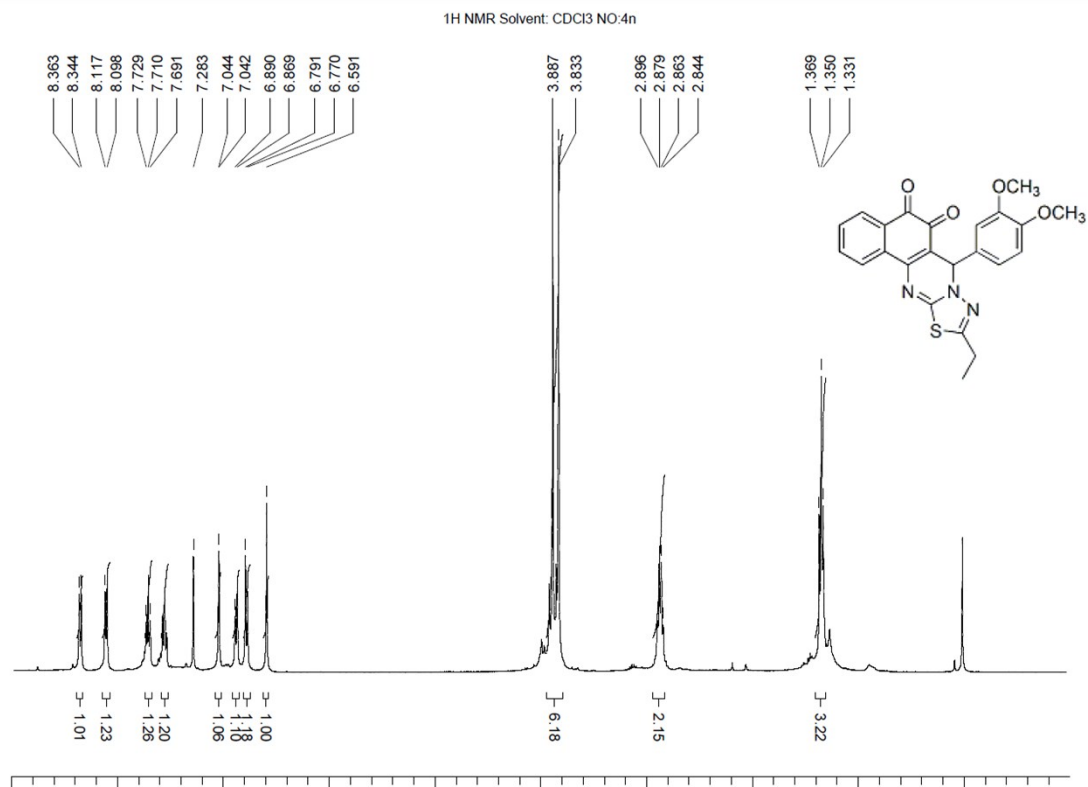

Figure 68 <sup>1</sup>H NMR of 4n

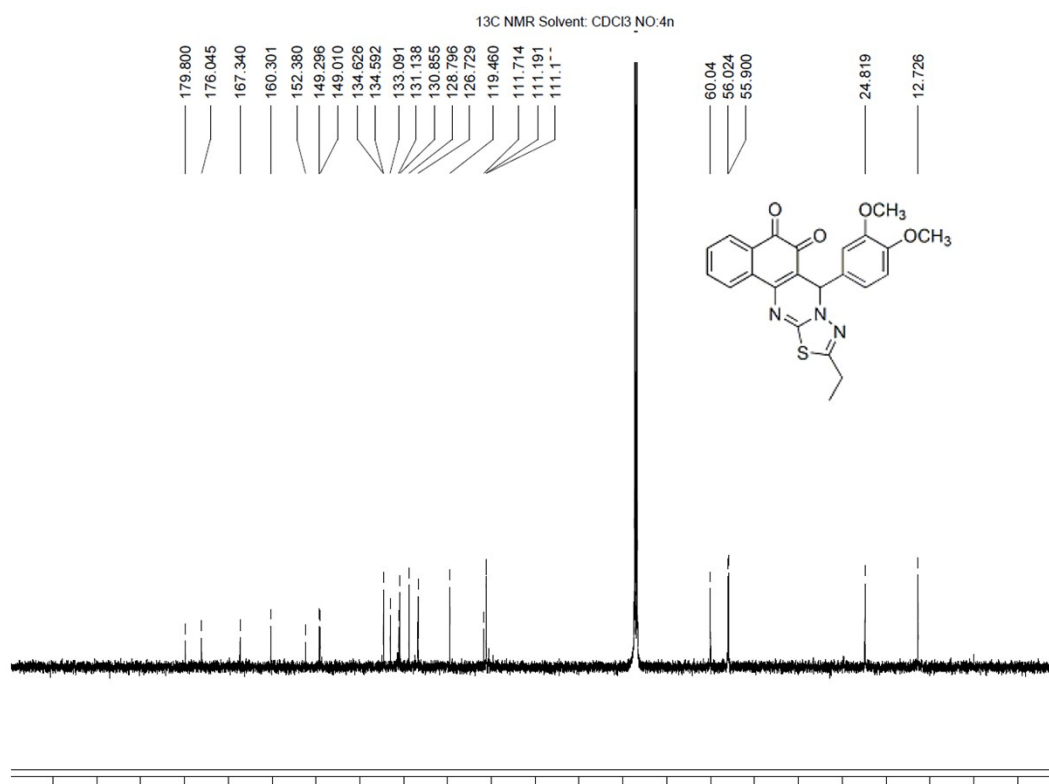

Figure 69  $^{13}\text{C}$  NMR of 4n

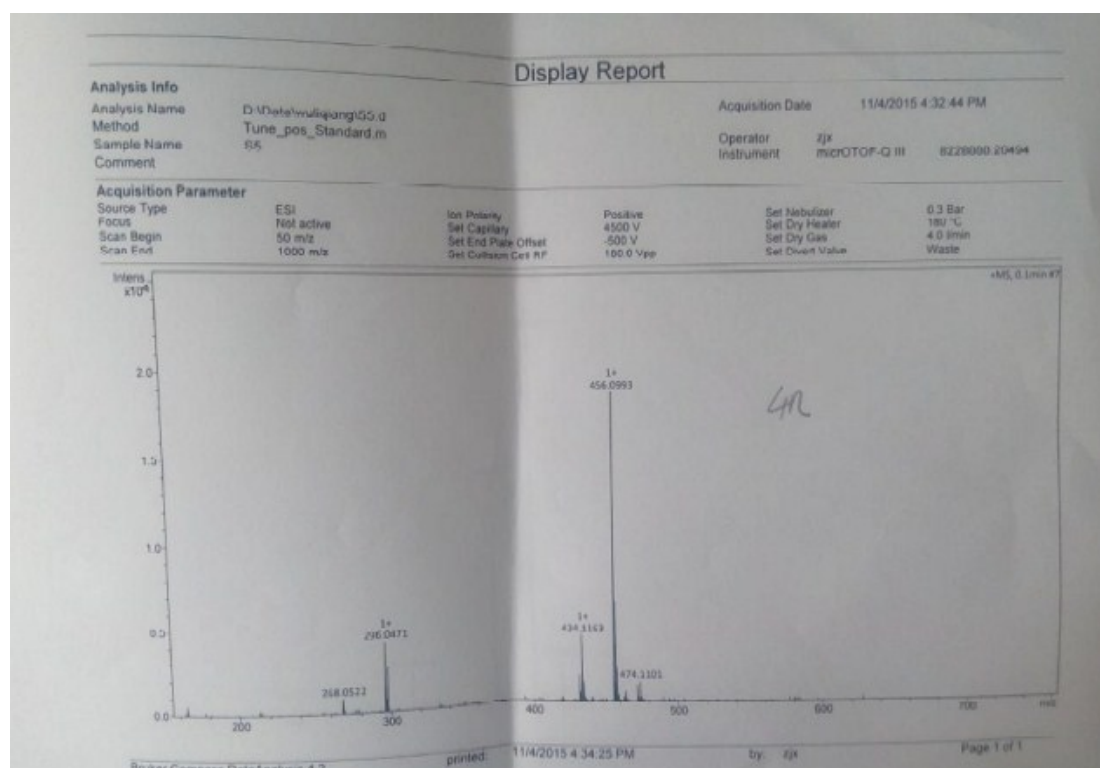

Figure 70 HRMS of 4n

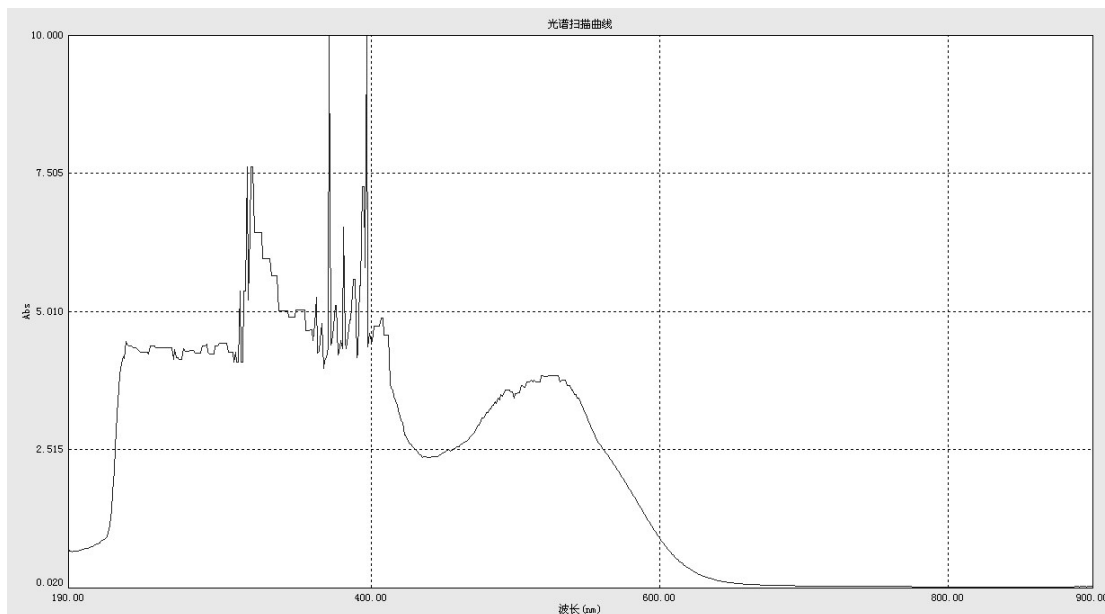

Figure 71 UV-vis of 4o

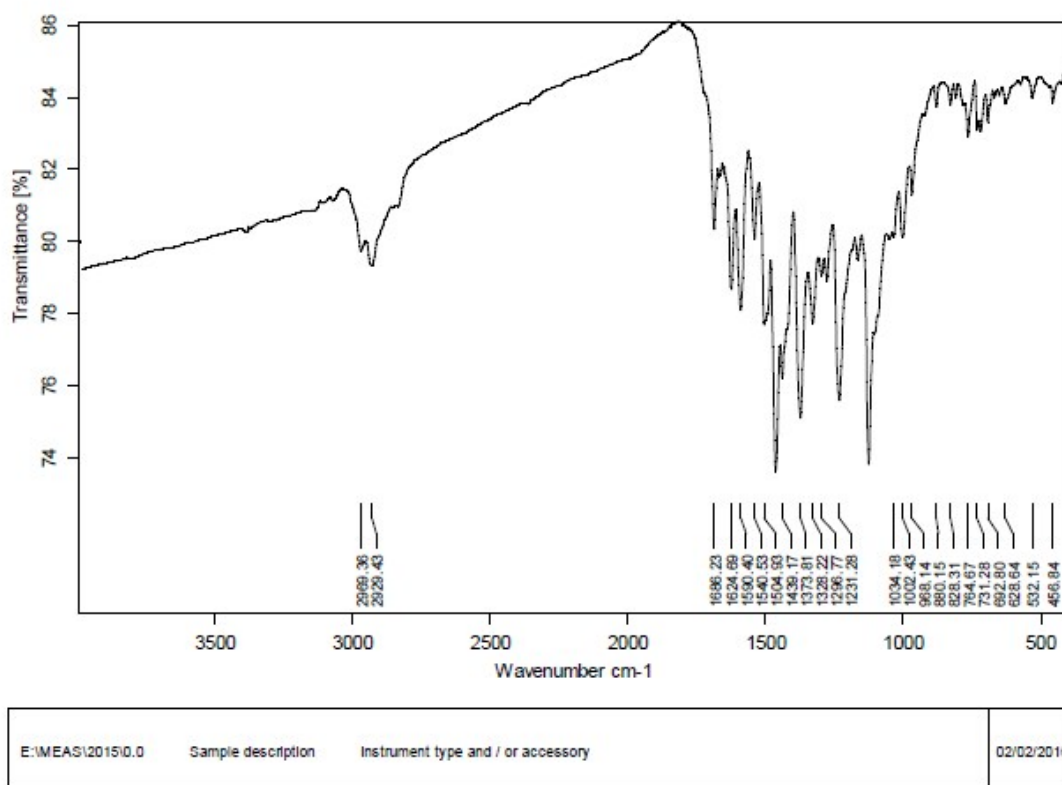

Figure 72 IR of 4o

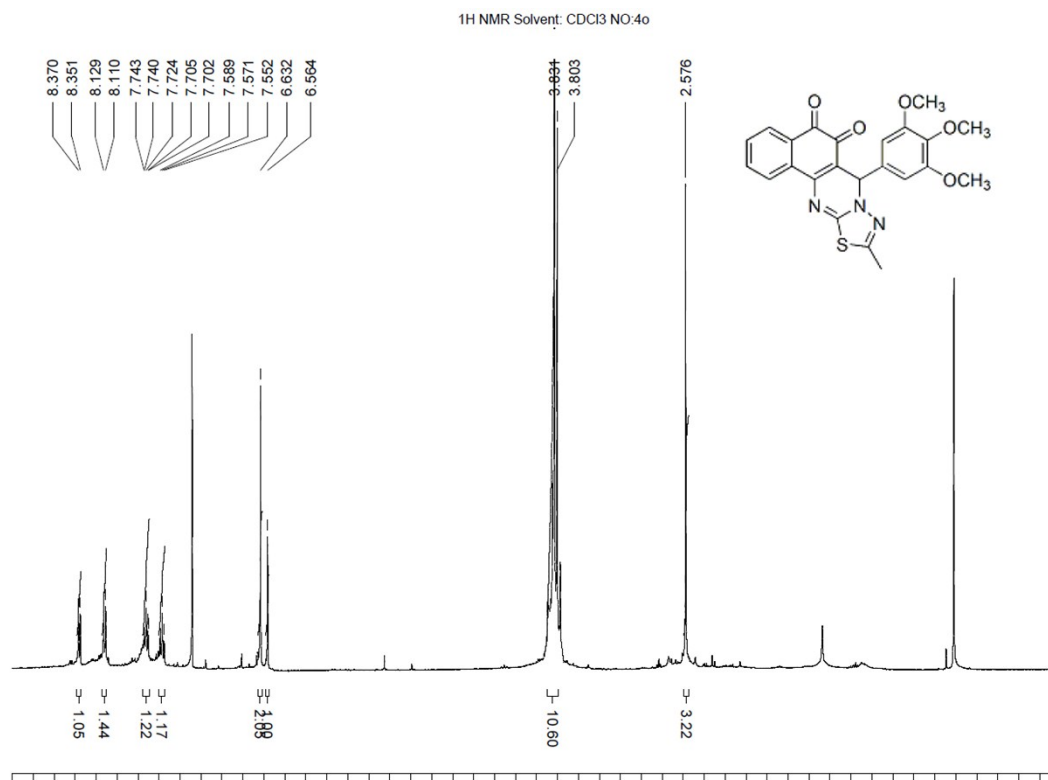

Figure 73  $^1\text{H}$  NMR of 4o

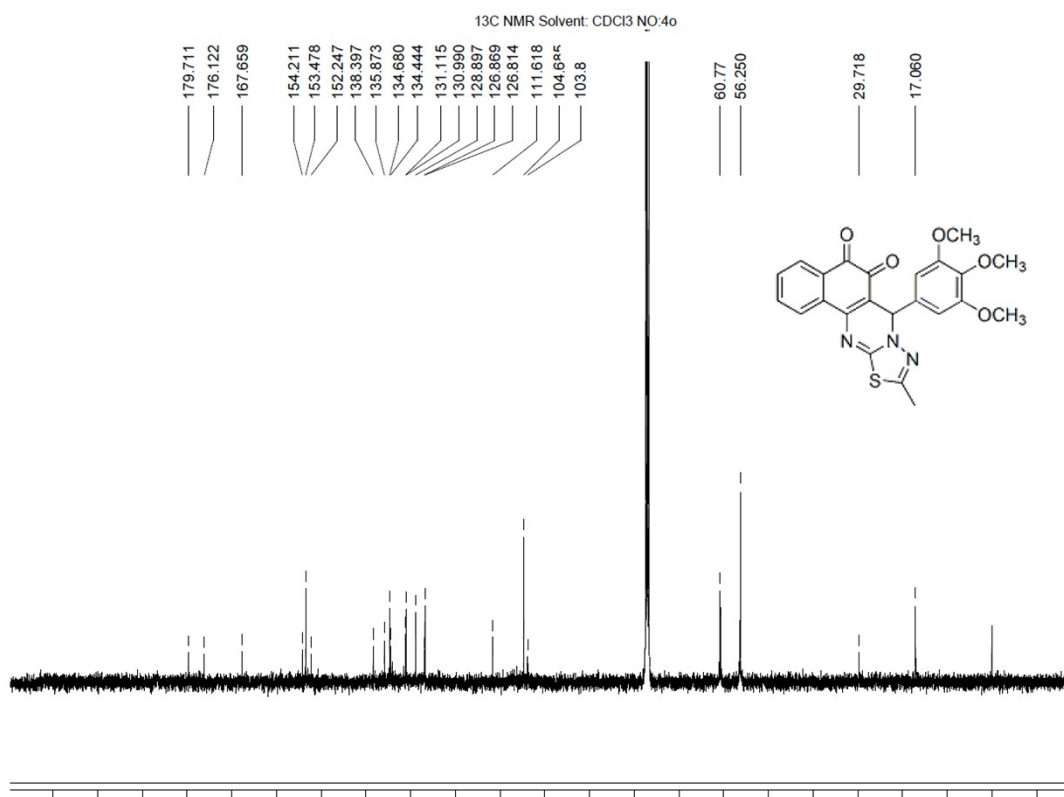

Figure 74  $^{13}\text{C}$  NMR of 4o

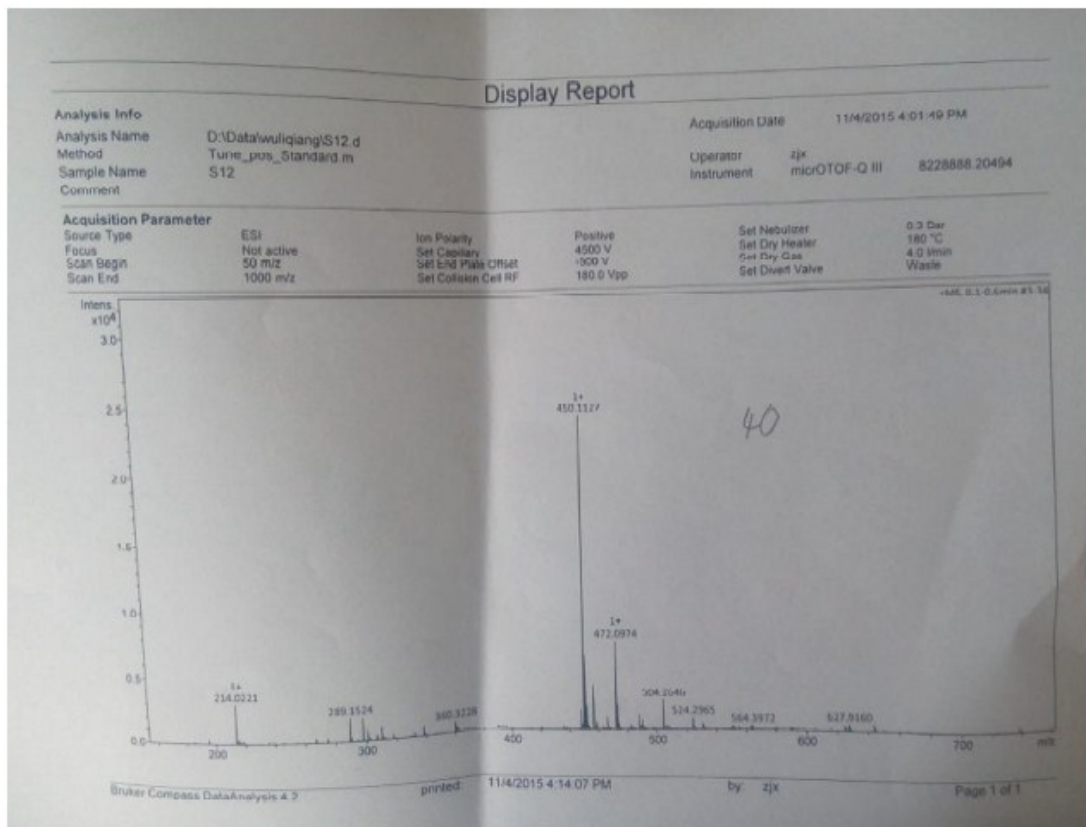

**Figure 75** HRMS of **4o**

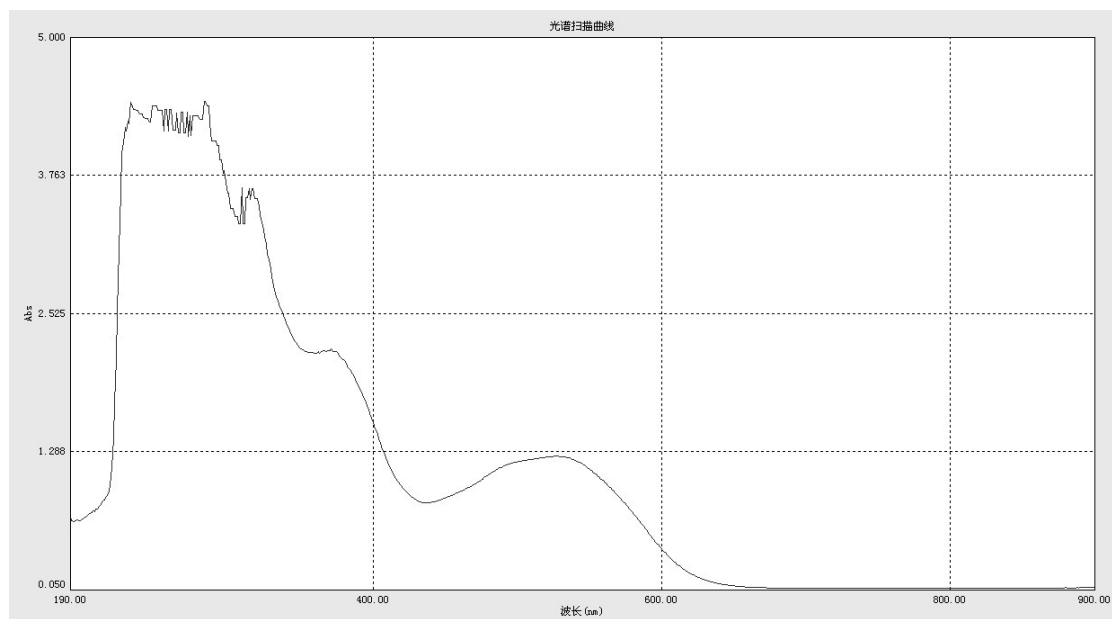

**Figure 76** UV-vis of **4p**

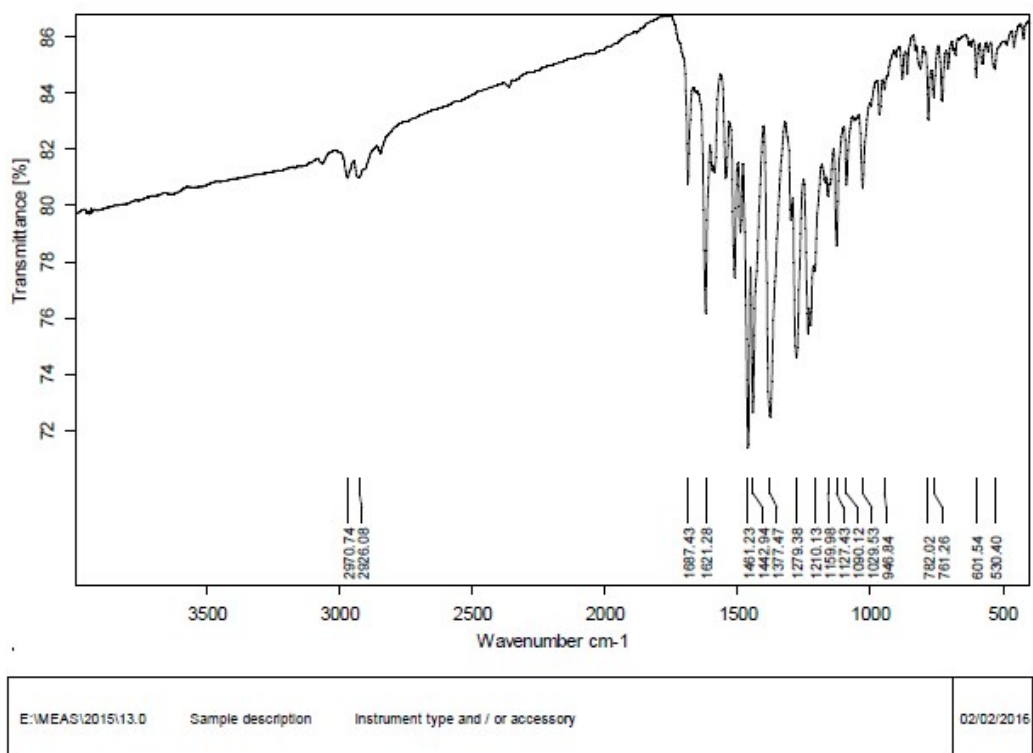

Figure 77 IR of 4p

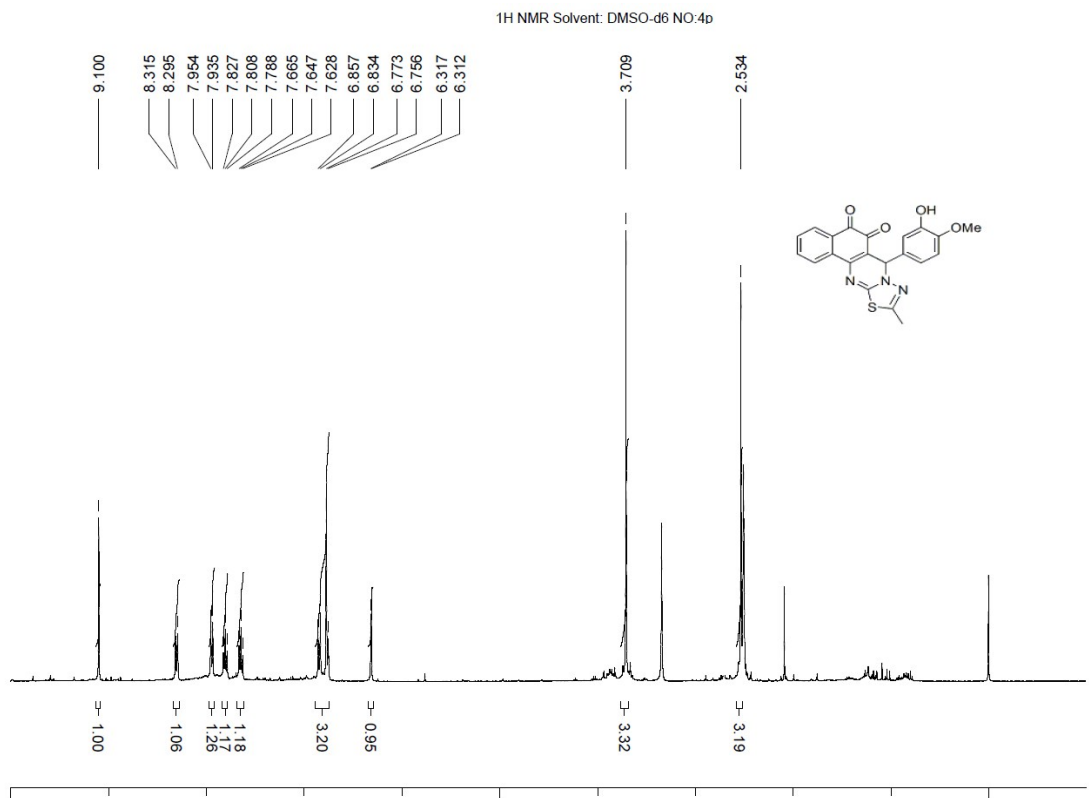

Figure 78 <sup>1</sup>H NMR of 4p



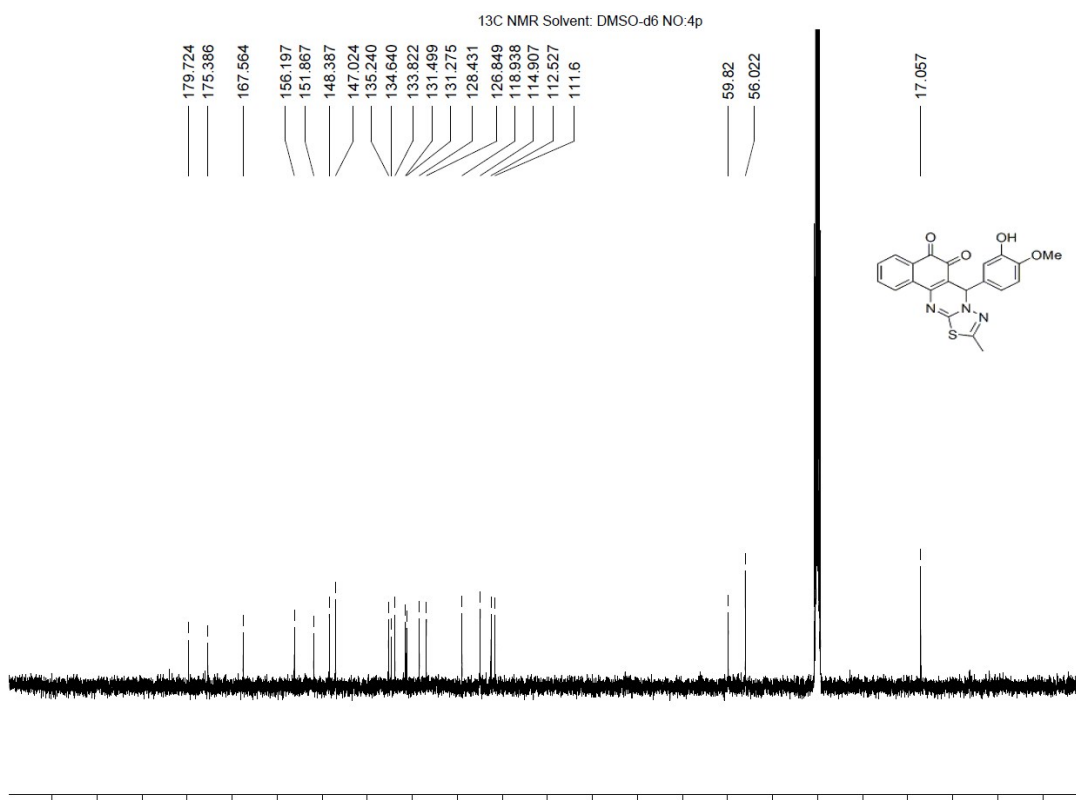

Figure 79 <sup>13</sup>C NMR of 4p

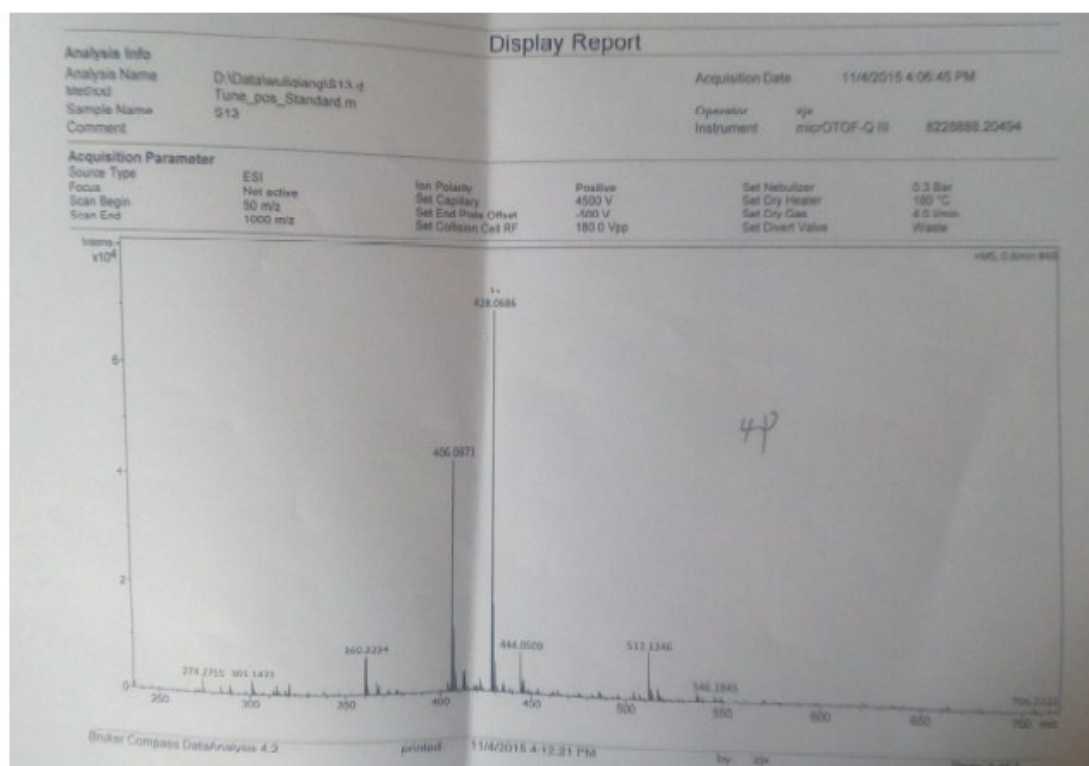

Figure 80 HRMS of 4p

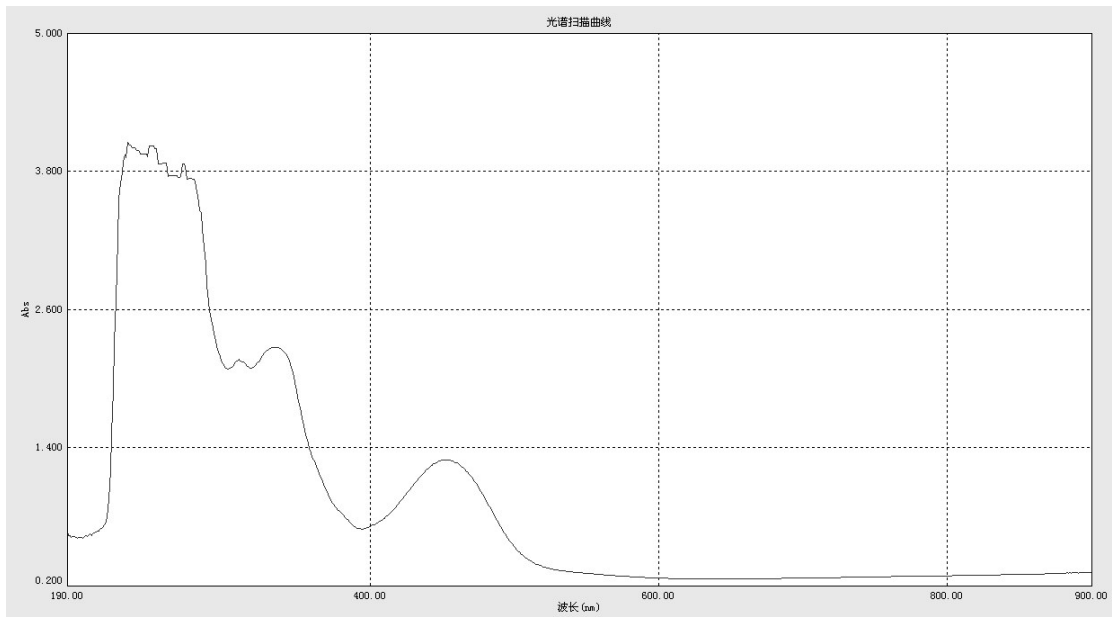

Figure 81 UV-vis of 5

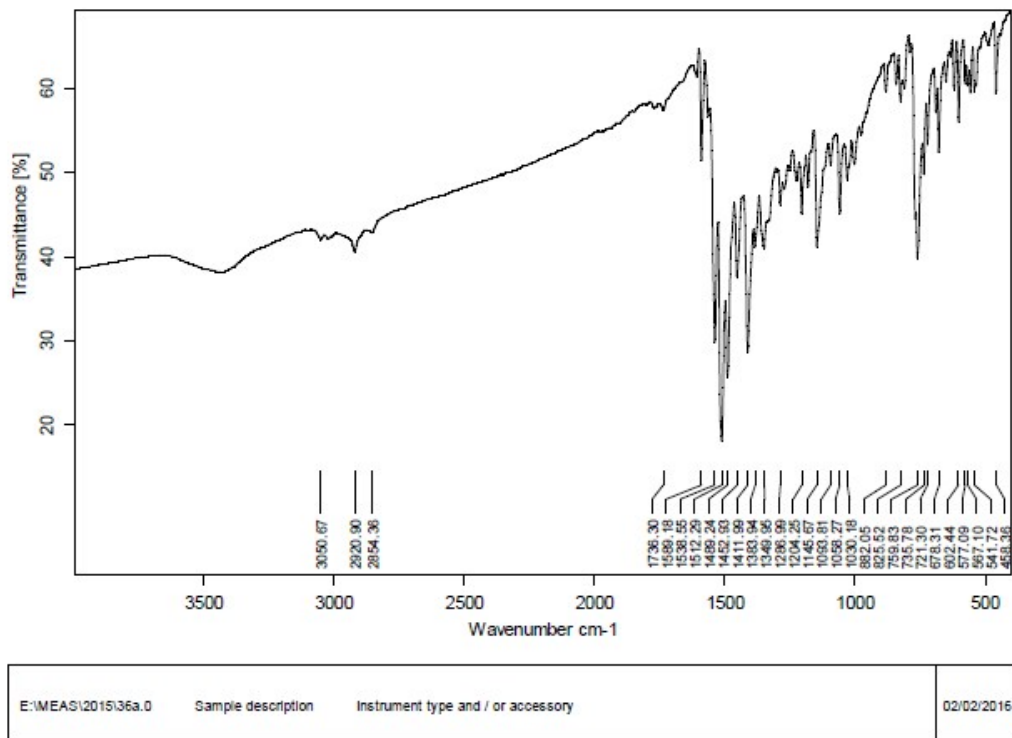

Figure 82 IR of 5

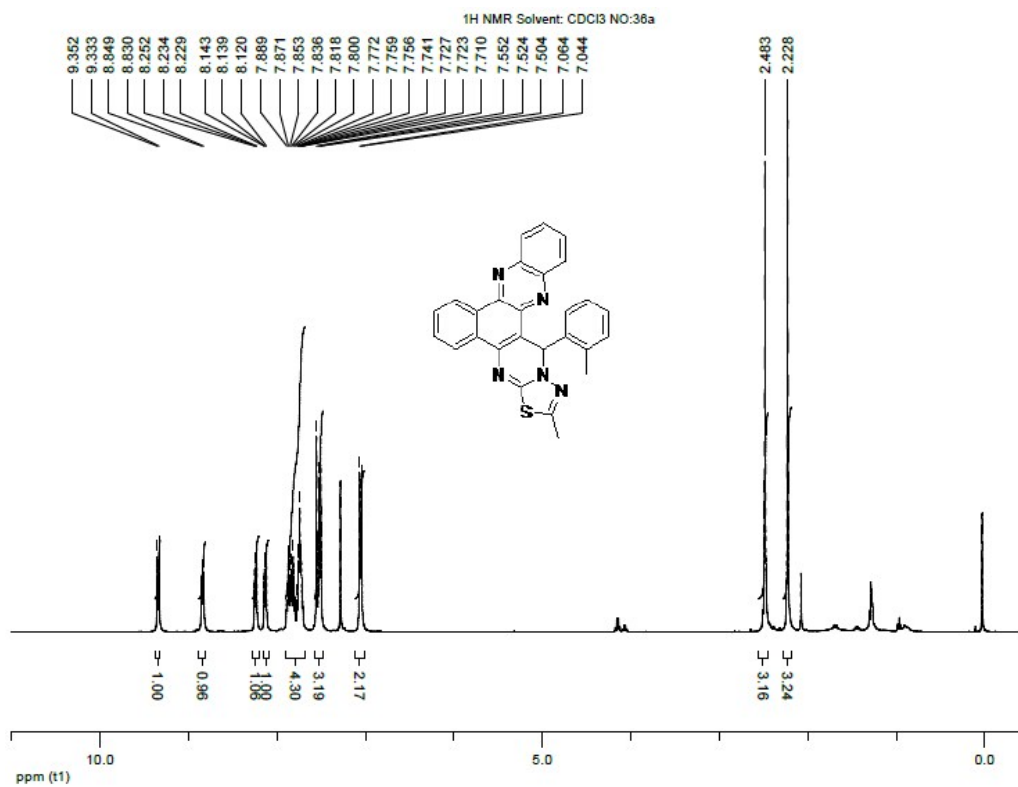

Figure 83 <sup>1</sup>H NMR of 5

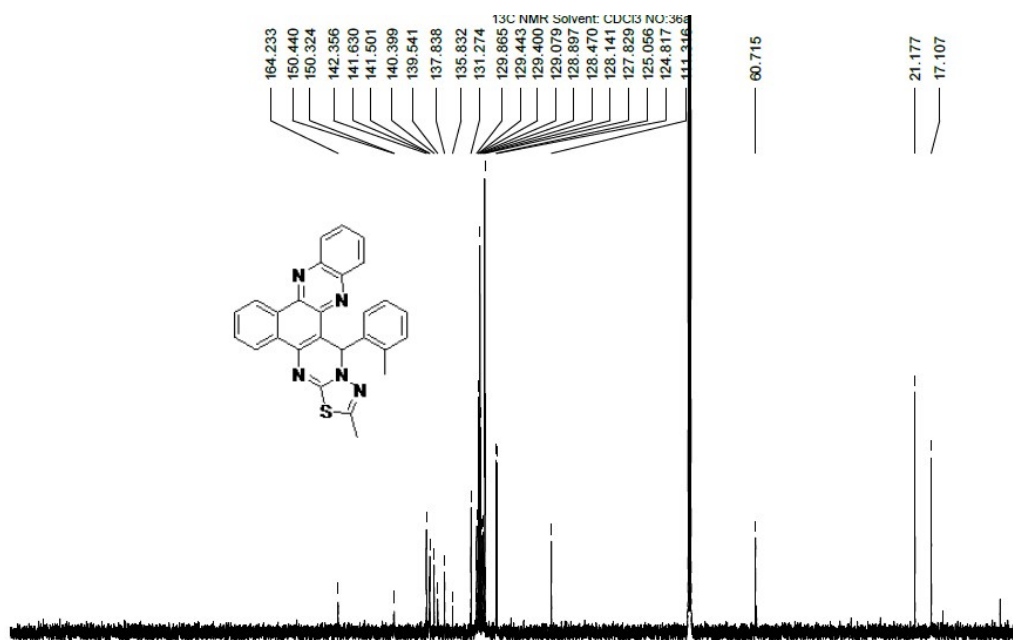

Figure 84 HRMS of 5

### Display Report

|                              |                           |                       |                |                      |           |
|------------------------------|---------------------------|-----------------------|----------------|----------------------|-----------|
| <b>Analysis Info</b>         |                           | Acquisition Date      |                | 4/20/2015 9:57:58 AM |           |
| Analysis Name                | D:\Data\wuliqiang\w-36a.d | Operator              | zjx            |                      |           |
| Method                       | Tune_pos_low.m            | Instrument            | micrOTOF-Q III | 8228888.20494        |           |
| Sample Name                  | w-36a                     |                       |                |                      |           |
| Comment                      |                           |                       |                |                      |           |
| <b>Acquisition Parameter</b> |                           |                       |                |                      |           |
| Source Type                  | ESI                       | Ion Polarity          | Positive       | Set Nebulizer        | 0.3 Bar   |
| Focus                        | Not active                | Set Capillary         | 4500 V         | Set Dry Heater       | 180 °C    |
| Scan Begin                   | 50 m/z                    | Set End Plate Offset  | -500 V         | Set Dry Gas          | 4.0 l/min |
| Scan End                     | 1000 m/z                  | Set Collision Cell RF | 120.0 Vpp      | Set Divert Valve     | Waste     |

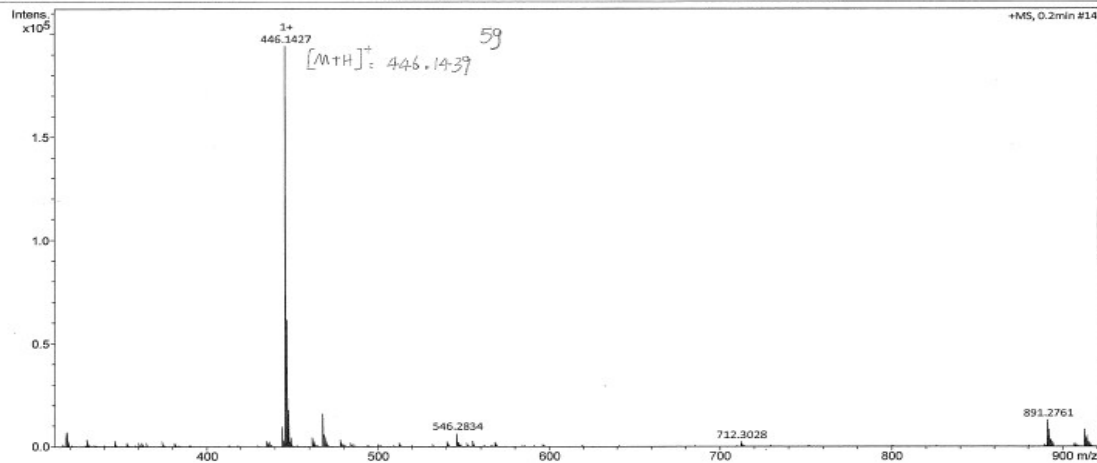

Figure 85 HRMS of 5
